# 1 **Tissue homeostasis in sponges: quantitative analysis of** 2 **cell proliferation and apoptosis**

3

4 Authors: Nikolai P. Melnikov<sup>1</sup>, Fyodor V. Bolshakov<sup>2</sup>, Veronika S. Frolova<sup>3</sup>, Ksenia V. Skorentseva<sup>4</sup>,  
5 Alexander V. Ereskovsky<sup>5,6,7\*</sup>, Alina A. Saidova<sup>4,8</sup> & Andrey I. Lavrov<sup>2</sup>

6 1 – Department of Invertebrate Zoology, Biological Faculty, Lomonosov Moscow State University,  
7 Moscow, Russia

8 2 – Pertsov White Sea Biological Station, Biological Faculty, Lomonosov Moscow State University,  
9 Moscow, Russia

10 3 – Department of Embryology, Biological Faculty, Lomonosov Moscow State University, Moscow,  
11 Russia

12 4 – Department of Cell Biology and Histology, Biological Faculty, Lomonosov Moscow State University,  
13 Moscow, Russia

14 5 – Institut Méditerranéen de Biodiversité et d'Ecologie Marine et Continentale (IMBE), Aix Marseille  
15 University, CNRS, IRD, Station Marine d'Endoume, Avignon University, Marseille, France

16 6 – Department of Embryology, Faculty of Biology, Saint-Petersburg State University, Saint-Petersburg,  
17 Russia

18 7 - Koltzov Institute of Developmental Biology of Russian Academy of Sciences, Moscow, Russia

19 8 – Department of Cell Biotechnology, Center of Experimental Embryology and Reproductive  
20 Biotechnology, Moscow, Russia

21 \* Corresponding author: [alexander.ereskovsky@imbe.fr](mailto:alexander.ereskovsky@imbe.fr)

## 1 Funding information

2 Fund of President of the Russian Federation, Grant/Award Number: MK-1096.2021.1.4;  
3 Russian Foundation for Basic Research, Grant/Award Numbers: 19-04-00545 and 19-04-00563;  
4 Russian Science Foundation, Grant/Award Number: 17-14-01089

## 5 Abstract

6 **Background:** Tissues of multicellular animals are maintained due to a tight balance between cell  
7 proliferation and programmed cell death. Phylum Porifera is an early branching group of metazoans  
8 essential to understanding the key mechanisms of tissue homeostasis. This paper is dedicated to the  
9 comparative analysis of proliferation and apoptosis in intact tissues of two sponges belonging to distinct  
10 Porifera lineages, *Halisarca dujardini* (class Demospongiae) and *Leucosolenia variabilis* (class  
11 Calcarea).

12 **Results:** Labeled nucleotides EdU and anti-phosphorylated histone 3 antibodies reveal a considerable  
13 number of cycling cells in intact tissues of both species. The main type of cycling cells are choanocytes  
14 - flagellated cells of the aquiferous system. The rate of proliferation remains constant in areas containing  
15 choanoderm. Cell cycle distribution assessed by the quantitative DNA stain reveals the classic cell cycle  
16 distribution curve. During EdU pulse-chase experiments conducted in *H. dujardini*, the contribution of  
17 the choanocytes to the total amount of EdU-positive cells decreases, while contribution of the mesohyl  
18 cells increases. These findings could indicate that the proliferation of the choanocytes is not solely  
19 limited to the renewal of the choanoderm, and that choanocytes may participate in the general cell  
20 turnover through migration. The number of apoptotic cells in intact tissues of both species is  
21 insignificant. *In vivo* studies in both species with TMRE and CellEvent Caspase-3/7 indicate that  
22 apoptosis might be independent of mitochondrial outer membrane permeabilization.

23 **Conclusions:** A combination of confocal laser scanning microscopy and flow cytometry provides a  
24 quantitative description of cell turnover in intact sponge tissues. Intact tissues of *H. dujardini*  
25 (Demospongiae) and *L. variabilis* (Calcarea) are highly proliferative, indicating either high rates of  
26 growth or cell turnover. Although the number of apoptotic cells is low, apoptosis could still be involved  
27 in the regular cell turnover.

1 **Key words:** cell turnover, cell proliferation, apoptosis, Porifera, Calcarea, Demospongiae

## 2 **Introduction**

3 Morphogenetic processes underlying the development, growth and regeneration of multicellular  
4 animals have long been issues of scientific interest. These phenomena seem to be closely related to a  
5 process of physiological regeneration, also known as cell turnover<sup>1,2</sup>. Cell turnover consists of three key  
6 elements: 1) the elimination of old, non-functional cells by programmed cell death; 2) the proliferation  
7 of somatic stem cells; and 3) the differentiation of newly generated cells along with their integration with  
8 preexisting tissue<sup>3</sup>. Physiological regeneration through tissue renewal is an essential process for  
9 multicellular animals, as it allows reparation of minor defects and tissue damage occurring during  
10 normal functioning<sup>1,4</sup>. Abnormalities of tissue homeostasis are associated with numerous malfunctions,  
11 including oncological and degenerative disorders<sup>4,5</sup>.

12 Sponges (phylum Porifera) are an early-branching metazoan group comprising aquatic, mostly  
13 filter-feeding, sedentary organisms<sup>6</sup>. These animals differ substantially from other metazoans in their  
14 body organization, lacking tissues and organ systems characteristic of other animals<sup>7,8</sup>. The central  
15 anatomical structure in a typical sponge body is its aquiferous system, a complex network of canals and  
16 chambers through which the sponge pumps surrounding water for food and oxygen uptake<sup>9</sup>. The rest  
17 of the sponge body is composed of the mesohyl, a tissue consisting of an extensive extracellular matrix  
18 and numerous wandering cells of different type and function<sup>9</sup>.

19 Sponge tissues appear to be less specialized than tissues of Eumetazoa. In particular, sponge  
20 tissues are multifunctional and highly plastic, as their cells show broad capabilities of transdifferentiation  
21 into other cell types<sup>10,11</sup>. The tissue plasticity underlays many aspects of sponge biology, participating  
22 in constant reorganization of the aquiferous system<sup>10</sup>, sexual and asexual reproduction<sup>8</sup>,  
23 regeneration<sup>12-17</sup> and even movement<sup>18-20</sup>.

24 At the same time, sponges lack a single category of somatic stem cells. Choanocytes  
25 (flagellated cells of the aquiferous system) and some amoeboid cells of the mesohyl (e.g., archaeocytes  
26 of Demospongiae) are both considered to be stem cells in sponges<sup>8,21,22</sup>. It has been shown for several  
27 species that choanocytes and archaeocytes proliferate in intact tissues, (trans)differentiate into other

1 cell types and take part in regeneration and gametogenesis<sup>8,14,21,23–25</sup>. These same cells also express  
2 some stem cell specific genes, such as members of the germline multipotency program<sup>23,26–28</sup>. Yet,  
3 choanocytes are usually interpreted as a minor component of the sponge stem cell system, i.e., the  
4 stock of archaeocyte progeny that is able to transform back to archaeocytes<sup>9,23</sup>.

5 For proper cell turnover, cell proliferation should be balanced by programmed cell death. The  
6 most common path of programmed cell death in intact animal tissue is apoptosis<sup>3,29–32</sup>. However,  
7 immunohistochemical studies reveal few apoptotic cells in sponges under the steady-state condition<sup>33</sup>.  
8 Most of these cells are amoeboid cells located in the mesohyl, with presumably apoptotic choanocytes  
9 being extremely rare<sup>33</sup>. On the other hand, some sponges seem to get rid of certain cell types  
10 (choanocytes, archaeocytes, lophocytes, spherulous and granular cells) discarding them into the  
11 environment through the aquiferous system<sup>33–35</sup>. These expelled cells show various signs of  
12 degradation, but the nature of this cell shedding remains obscure<sup>33</sup>.

13 Considering these peculiarities surrounding tissue organization, sponges can be promising  
14 objects for studies regarding the origin and evolution of physiological regeneration mechanisms in  
15 metazoans. Therefore, the aim of this study is to provide comparative and quantitative analysis of cell  
16 proliferation and apoptosis in intact tissues of two sponge species, *Halisarca dujardinii* Johnston, 1842  
17 (Demospongiae) and *Leucosolenia variabilis* Haeckel, 1870 (Calcarea). These species belong to  
18 different Porifera classes and represent principally different types of aquiferous system organization<sup>12,36</sup>.  
19 Using combined approaches of confocal laser scanning microscopy and flow cytometry, we have  
20 identified proliferating and apoptotic cells in sponge tissue while evaluating their number and distribution  
21 throughout the sponge body. Altogether, this data complements the concept of tissue dynamics in these  
22 basal metazoans.

## 23 **Results**

### 24 ***Cell proliferation in intact sponge tissues: quantitative analysis and*** 25 ***spatial distribution***

26 *Halisarca dujardinii* (class Demospongiae) is a thick globular sponge with 1-2 oscular tubes and  
27 a leuconoid aquiferous system (Figure 1A, B). Its body is subdivided into two regions, the ectosome

1 and the endosome (Figure 1C). The ectosome represents a superficial region of the body devoid of  
2 choanocyte chambers. The external parts of the T-shaped exopinacocytes are underlined with a thick  
3 layer of diffuse collagen that contains rare spherulous cells (Figure 1C). A dense layer of amoeboid  
4 cells (e.g., spherulous and granular cells) and cell bodies of the exopinacocytes are located beneath  
5 the diffuse collagen layer (Figure 1C). The internal region of a sponge, the endosome, contains large,  
6 tubular choanocyte chambers surrounded by the mesohyl (Figure 1C, D). The mesohyl contains  
7 numerous cells (e.g., archaeocytes, lophocytes, spherulous, vacuolar and granular cells) and occupies  
8 a significant volume of the endosome (Figure 1C). The structure of the aquiferous system is similar in  
9 regions of the endosome adjacent to the oscular tube, and at some distance (approximately half the  
10 body radius) from it (Figure 2A, B). The oscular tube is a principally different region of a sponge,  
11 representing a thin-walled outgrowth composed mainly of exo- and endopinacoderm (Figure 2C). A thin  
12 layer of mesohyl lies between the exo- and endopinacoderm. Choanocyte chambers are absent.

13 To evaluate the number and distribution of proliferating cells in intact tissues of *Halisarca*  
14 *dujardinii*, we have utilized two markers: 5-ethynyl-2'-deoxyuridine (EdU) and Ser10-phosphorylated  
15 histone 3 (pH3) monoclonal antibodies. After 12 hours of treatment with 200  $\mu$ M EdU, intact tissues of  
16 *H. dujardinii* contained numerous EdU-positive nuclei belonging to a population of cycling cells (Figure  
17 2A, B). Few cells showed nuclei labeled with pH3-antibodies, representing a fraction of cycling cells in  
18 the late G2 or M phases. Even fewer were pH3-positive cells containing EdU in their nuclei. The  
19 endosome adjacent to the oscular tube and the endosome distant from the oscular tube displayed  
20 similar fraction of proliferating cells, containing  $8.44 \pm 3.08\%$  and  $8.10 \pm 1.64\%$  of EdU-positive cells,  
21 respectively. Each of the beforementioned regions also had  $0.11 \pm 0.07\%$  of pH3-positive cells (Figure  
22 3A, B; Table 1). Dunn test shows no significant differences between these regions ( $p$ -values  $> 0.9999$   
23 for both markers). Both regions also showed a similar distribution of proliferating cells; most of the EdU-  
24 and pH3-positive nuclei (approximately 90% of all labeled nuclei) were located in the choanocyte  
25 chambers and belonged to choanocytes, while EdU- and pH3-positive nuclei in the mesohyl are few  
26 (Figures 2A, B; 3C, D; Table 1).

27 There were  $0.61 \pm 0.64\%$  of EdU-positive cells and no pH3-positive cells in the oscular tube  
28 (Figures 2C; 3A, B; Table 1). All EdU-positive cells belonged to the mesohyl/pinacoderm, as this region  
29 is devoid of choanocyte chambers (Figure 3C). The fraction of EdU-positive cells in the oscular tube is

1 significantly lower than the total fraction of EdU-positive cells in the regions of the endosome ( $p < 0.05$   
2 in each comparison) (Figure 3A). The fraction of EdU-positive cells in the oscular tube showed no  
3 difference with regards to the fraction of EdU-positive mesohyl cells in the regions of the endosome ( $p$ -  
4 values  $> 0.9999$  in each comparison) (Figure 3C).

5 *Leucosolenia variabilis* (class Calcarea) is an asconoid sponge; its body is a plexus of  
6 branching and anastomosing thin-walled hollow tubes forming the cormus (Figure 4A). The cormus  
7 gives rise to the oscular tubes and the blind outgrowths or diverticula. The body wall is composed of  
8 the exopinacoderm and choanoderm layers separated by a thin mesohyl layer containing few cells,  
9 mostly amoebocytes and sclerocytes (Figure 4C-G). The cell bodies with nuclei of T-shaped  
10 exopinacocytes and porocytes are located near the mesohyl cells (Figure 4E). The choanocytes are  
11 easily distinguished from other cells as they form a continuous layer of tightly packed pyriform nuclei  
12 associated with flagella (Figure 4E-G). The structure of the body wall as described is characteristic of  
13 most body regions in *L. variabilis*: diverticula, cormus tubes and the oscular tubes. In the oscular rim,  
14 the most distal part of the oscular tube, the structure of the body wall is altered since choanocytes are  
15 substituted by flat endopinacocytes (Figure 4C).

16 Intact tissues of *L. variabilis* displayed a significant number of cycling cells after 6 hours of  
17 treatment with 20  $\mu\text{M}$  EdU and pH3-antibodies labeling (Figure 5A-G). Few pH3-positive cells displayed  
18 EdU signal in the nuclei (Figure 5H). Regions containing choanocytes exhibited a high proliferation rate.  
19 Most of these regions (*i.e.*, cormus tubes, proximal parts of diverticula, oscular tubes) showed a similar  
20 fraction of proliferating cells ( $p$ -values  $> 0.9999$  in each pairwise comparison), each containing about  
21 10% of EdU-positive and 0.6% of pH3-positive cells (Figures 5B-G; 6A, B; Table 2). In the distal parts  
22 of the diverticula, the proportion of pH3-positive cells remained the same ( $0.50 \pm 0.20\%$ ), while the  
23 proportion of EdU-positive cells decreased ( $6.53 \pm 2.08\%$ ) (Figure 6A, B; Table 2). The decrease of EdU-  
24 positive cells is significant when compared to the distal and middle parts of oscular tubes ( $p$ -  
25 values = 0.0068 and 0.0022, respectively). In other pairwise comparisons, differences were are  
26 insignificant, but  $p$ -values were slightly higher than 0.05. The oscular rim had the lowest fraction of  
27 proliferating cells when compared to other body parts, containing only  $0.40 \pm 0.96\%$  of EdU-positive and  
28  $0.17 \pm 0.20\%$  of pH3-positive cells (Figure 6A, B; Table 2). The decrease in the number of EdU labeled  
29 cells is significant when compared across other body regions, except for the distal part of the diverticula.

1 Most of the EdU- and pH3-positive cells of *L. variabilis* are choanocytes. However, a few of the  
2 EdU-positive and pH3-positive cells belonged to the mesohyl/pinacoderm layer (Figures 5A-G; 6C, D).  
3 The proportion of choanocytes in the total number of EdU-positive cells remained almost the same  
4 (95% on average) in different parts of the oscular tube, cormus and diverticula (Figure 6C; Table 2).  
5 With regards to the pH3-positive cells, choanocytes represented approximately 75% of all the late G2/M  
6 cells (Figure 6D; Table 2). In the distal parts of the diverticula, their proportion decreased  
7 (40.64±22.29%; Figure 6D; Table 2). This decrease is significant in comparison to the cormus, middle  
8 and proximal parts of the oscular tube ( $p=0.0023$ ,  $0.0003$  and  $0.0002$ , respectively).

### 9 ***EdU tracking in Halisarca dujardinii under the steady-state condition***

10 Since labeled nucleotides are transferred to daughter cells after mitosis, EdU allows us to track  
11 proliferating cells or their progeny. We treated individuals of *H. dujardinii* with 200  $\mu$ M EdU for 12 hours  
12 and moved them into the running seawater aquarium. In the aquarium, the incorporation of EdU ceases  
13 and the distribution of EdU-positive cells in intact tissue of *H. dujardinii* gradually changes. Specifically,  
14 the contribution by choanocytes to the total amount of EdU-positive cells decreases while contribution  
15 by mesohyl cells increases (Figure 7A, B). At the start of the experiment the mesohyl cells accounted  
16 for only 7.92±6.11% of the labeled cells; after 7 days their fraction significantly increased, reaching  
17 55.12±23.15% ( $p=0.0026$ ) (Figure 7C).

### 18 ***Cell cycle distribution in cell suspensions of Halisarca dujardinii and*** 19 ***Leucosolenia variabilis***

20 Cell cycle distribution was assessed by the quantitative DNA staining of single-cell suspensions  
21 obtained via mechanical dissociation in calcium and magnesium-free seawater (CMFSW-E). The major  
22 part of *H. dujardinii* cells (38.94±5.90%) formed a diploid G0/G1 population peak (Figure 8A; Table 3).  
23 The tetraploid cells in the G2/M phase formed a less distinguishable peak characterized by a 2-fold  
24 higher fluorescence intensity than that of the G1/G0 cells (Figure 8A). The G2/M population contained  
25 9.28±1.78% of all cells (Table 3). Cells in the S phase were located between the G0/G1 and G2/M  
26 populations and accounted for 20.18±6.14% of the total population (Table 3). The SubG1 population  
27 was characterized by lower DNA content than G1/G0 cells (Figure 8A). Scatter plots indicated that the

1 SubG1 population consisted of small and highly granulated objects - possibly, dying cells and debris  
2 (Figure 8C).

3 CMFSW-E suspensions of *L. variabilis* did not provide reliable data: they contained too many  
4 SubG1 and too few G2/M cells to obtain an accurate cell cycle distribution histogram and were ultimately  
5 excluded from further analysis. We therefore used suspensions made from pre-fixed tissue of *L.*  
6 *variabilis*. This method provided improved resolution: suspensions contained fewer SubG1 cells and  
7 showed well-distinguishable G0/G1 and G2/M peaks. The general appearance of the histogram was  
8 similar to *H. dujardinii* (Figure 8B). The proportion of G0/G1 cells was  $53.88 \pm 2.59\%$ ,  $12.58 \pm 0.76\%$  for  
9 S cells and  $4.63 \pm 1.79\%$  for G2/M cells (Table 3).

## 10 ***Investigation of apoptotic activity***

11 To study the apoptosis, individuals of *H. dujardinii* and *L. variabilis* were vitally stained with  
12 fluorescent substrate for effector caspases, CellEvent, for two hours. Subsequent CLSM studies  
13 revealed an insignificant number of apoptotic cells in intact tissues of the sponges (Figure 9A, D). Most  
14 of these cells exhibited a weak CellEvent fluorescence and were differentiated from autofluorescent  
15 cells by nuclear localization of the signal characteristic of CellEvent (Figure 9B-F). In *L. variabilis*, the  
16 proportion of CellEvent-positive cells did not exceed 1% in any of the studied body regions (Table 4).  
17 Both choanocytes and mesohyl cells were present among the apoptotic cells. The endosome of *H.*  
18 *dujardinii* showed even less apoptotic activity; for every 6-9 thousand normal cells, there were usually  
19 1-2 CellEvent-positive ones (Table 4).

20 We also studied suspensions obtained via mechanical dissociation in CMFSW-E. They were  
21 stained with CellEvent, fixed, and analyzed via a flow cytometer. Cells of *H. dujardinii* formed a single  
22 peak with low/negative CellEvent fluorescence (Figure 10A, B). The fraction of apoptotic cells was low,  
23 with CellEvent-positive cells accounting only for  $1 \pm 1.15\%$  of the total population. In contrast, cells of *L.*  
24 *variabilis* were clearly divided into two subpopulations by the level of CellEvent fluorescence (Figure  
25 10C, D). CellEvent-positive cells with elevated autofluorescence (as evidenced by increased short-  
26 wave fluorescence in the PacificBlue channel) comprised  $60.8 \pm 13.46\%$  of the total cell population  
27 (Figure 10C, D). We consider this result as a sampling artifact (see "Discussion" section)



1 Suspensions were also studied *in vivo* during the experiment, where non-fixed suspensions  
2 were stained for 30 min with CellEvent and TMRE (TMRE indicates the presence of the mitochondrial  
3 outer membrane potential - i.e., the viability of the mitochondria). These suspensions were studied both  
4 by CLSM and flow cytometry. Four cell types were distinguished via CLSM (Figure 11A):

- 5 1. TMRE+ CE- cells possessing functional mitochondria (as indicated by TMRE fluorescence) and  
6 no active effector caspases (as clear nuclear CellEvent signal is absent);
- 7 2. TMRE- CE- cells characterized by the absence of viable mitochondria or active effector  
8 caspases (i.e., no CellEvent or TMRE fluorescence observed);
- 9 3. TMRE+ CE+ cells possessing both functional mitochondria and active effector caspases (bright  
10 TMRE and CellEvent signals are present);
- 11 4. TMRE- CE+ cells distinguished by high activity of effector caspases and the loss of the  
12 mitochondrial outer membrane potential; these cells display bright nuclear CellEvent signal but  
13 no TMRE fluorescence.

14 The same types of cells were observed using a flow cytometer (Figure 11B-D). Both species  
15 demonstrated similar cell distributions. The majority of the cells belonged to the TMRE+ CE- population,  
16 which resides in quadrant Q1 and accounted for  $89.67 \pm 1.06\%$  of the cells in *H. dujardinii* and  
17  $70.55 \pm 1.48\%$  of the cells in *L. variabilis* (Figure 11C, D; Table 5). The population of the TMRE+ CE+  
18 cells was in the area of higher CellEvent fluorescence, Q2. This population reached  $7.51 \pm 0.87\%$  in *H.*  
19 *dujardnii* and  $8.58 \pm 0.77\%$  in *L. variabilis* (Figure 11C, D; Table 5). All TMRE- CE+ cells were in Q3 and  
20 do not exceed 1% of the general population and do not form a distinguishable cluster (Figure 11C, D;  
21 Table 5). All CellEvent-positive cells (Q2 and Q3) were small and highly granulated, as indicated by  
22 light scattering parameters (Figure 11B). Population of TMRE- CE- cells was located in Q4 and  
23 accounted for  $1.67 \pm 0.35\%$  in *H. dujardinii* and  $13.70 \pm 3.25\%$  in *L. variabilis* (Figure 11C, D; Table 5).  
24 While these cells were smaller than TMRE+ CE- cells, they tended to separate from TMRE+ CE+ cells  
25 on scatter plots (Figure 11B).

## 26 Discussion

27 In multicellular animals, the long-term maintenance of tissue homeostasis is achieved by cell  
28 turnover<sup>1,4</sup>. Cell turnover is composed of three complementary processes: cell proliferation, cell

1 differentiation and programmed cell death<sup>3</sup>. Sponges are basal metazoans well known for their unique  
2 tissue dynamics. In this study, we mainly focused on cell proliferation and apoptosis in intact tissues of  
3 sponges, providing promising data on cell turnover in sponges.

#### 4 ***Cell proliferation in intact tissues of *Halisarca dujardinii* and*** 5 ***Leucosolenia variabilis***

6 *Halisarca dujardinii* is a leuconoid demosponge that displays a significant number of cycling  
7 cells under the steady-state condition. The presence of EdU- and pH3-positive cells in intact tissue is  
8 consistent with flow cytometry data. It should be noted that the distribution of *H. dujardinii* cells by DNA  
9 content reveals the classic cell cycle distribution curve<sup>37</sup>. However, the estimates of proliferating cell  
10 fractions by CLSM and flow cytometry are slightly different. The proportion of EdU- and pH3-positive  
11 cells is about 8% of the total cell number, while S plus G2/M cells together reach 28%. Being  
12 undetectable by our CLSM staining, cells in G2-phase could account for the observed difference.

13 Different regions of the endosome displayed active proliferation and did not differ significantly  
14 between the proportions of EdU- and pH3-positive cells. Our results indicate that the proliferation activity  
15 is evenly distributed throughout the sponge's endosome. The oscular tube possesses a different pattern  
16 of proliferation and contains few labeled cells. We attribute this difference to the absence of choanocyte  
17 chambers and choanocytes in the oscular tube. In other demosponges, choanocytes have been shown  
18 to incorporate labeled nucleotides<sup>14,33,34,38</sup>, however, they might have retained the BrdU signal as the  
19 progeny of other proliferating cells. Here we demonstrate that choanocytes also make up the majority  
20 of cells labeled with anti-pH3 antibodies. Thus, choanocytes are the main proliferating fraction of cells  
21 in *H. dujardinii*.

22 *Leucosolenia variabilis* is a calcareous asconoid sponge that has a similar pattern of cell  
23 proliferation as *H. dujardinii*. As in other calcareous sponges, the majority of DNA synthesizing cells are  
24 choanocytes<sup>12,38</sup>. Most pH3-labeled cells are also choanocytes, although the proportion of choanocytes  
25 among all pH3-labelled cells is lower in *L. variabilis* than in *H. dujardinii*. Body regions containing  
26 choanocytes displayed a high number of cycling cells and do not differ in the rate of proliferation. The  
27 only exception is in the distal parts of the diverticula. Fewer EdU-positive cells were found there yet the

1 proportion of pH3-positive cells remained nearly the same. This body region also differed in the  
2 proportion of choanocytes among the pH3-positive cells, with nearly half of the G2/M cells belonging to  
3 the mesohyl/pinacoderm layer. This could be evidence of potential growth since new sclerocytes,  
4 pinacocytes and porocytes are obviously needed to lengthen the diverticula. In the oscular rim, which  
5 is devoid of choanocytes, the intensity of cell proliferation was very low. There are, however, a few  
6 labeled cells, indicating either slow cell turnover or growth.

7 This study provides the first spatial analysis of cell proliferation across different body regions of  
8 sponges representing distinct phylogenetic lines and types of aquiferous systems. In general,  
9 proliferation activity appears to be evenly distributed throughout the tissues of sponges (excluding  
10 regions that do not contain choanocytes). The proportion of cycling cells in *H. dujardinii* is lower than  
11 that of other Demosponges, in which this parameter reaches 20-25% on average<sup>34,38</sup>. Among  
12 calcareous sponges, the proportion of cycling cells in *L. variabilis* is slightly higher than in *Sycon*  
13 *coactum*<sup>38</sup>. It should also be noted that during our regeneration studies, the proportion of EdU-labeled  
14 cells in *L. variabilis* was overestimated when compared to current data, and is likely an artifact of the  
15 counting technique<sup>12</sup>. Similar to the previous studies, we detected that DNA synthesis occurs primarily  
16 in the choanocytes; moreover, we show that the distribution of mitotic cells in adult sponges have an  
17 overall similar pattern. The proportion of proliferating cells in *H. dujardinii* and *L. variabilis* strongly  
18 resembles those animals characterized by fast cell turnover, including platyhelminthes, cnidarians and  
19 bivalves<sup>39-42</sup>.

## 20 ***The contribution of choanocytes to homeostasis***

21 The physiological role of proliferation in intact tissues is either growth or renewal<sup>3</sup>. In order to  
22 understand the general dynamics of sponge tissue, we need to figure out the fate of proliferating cells.  
23 In intact sponges, cell proliferation takes place in the choanoderm. Since the choanoderm is  
24 metabolically active and directly exposed to the environment, we should expect higher rates of  
25 choanocyte turnover<sup>4</sup>. Similar to feeding structures of other suspension feeders, constant replacement  
26 of old and damaged cells is crucial for the long-term maintenance of the choanoderm<sup>42-45</sup>. Despite  
27 constantly facing a potentially hostile environment (e.g., toxic and mutagenic factors dissolved in  
28 seawater), choanocytes undergo constant proliferation and represent the main source of new cells in

1 the choanoderm. It should be noted here that the proliferation of morphologically differentiated cells is  
2 fairly common among metazoans, including vertebrates<sup>3,46–49</sup>. Cnidarians are particularly interesting  
3 given that ecto- and endodermal epithelial cells act not only as barrier and contractile cells, but also  
4 retain multipotency and the ability to proliferate<sup>50</sup>.

5 In fact, the boundary position of choanocytes might be advantageous since cell division requires  
6 significant amount of resources. As the primary food-entrapping sponge cells, choanocytes are provided  
7 with sufficient energy for constant proliferation and are able to respond appropriately to environmental  
8 changes. Moreover, since the choanoderm is obviously enriched by cell-cell interaction, and at least  
9 partially compartmentalized by extracellular matrix<sup>18</sup>, it could maintain the proliferative potential of  
10 choanocytes through some signaling system resembling that of the stem cell niche. In some animals  
11 (e.g., *Hydra* and planarians), the concept of ‘niche’ may be interpreted in a rather broad sense and  
12 include a whole organ or tissue as a stem cell niche<sup>69,70</sup>. The choanoderm in sponges might be just an  
13 example of such a “tissue niche”.

14 Since the flagellum is resorbed during cell division, the filtration process becomes impaired. To  
15 resolve the conflict between proliferation and food uptake, choanocytes either maintain the proliferating  
16 fraction at a certain level, or, minimize the period when the flagellum is absent. The short duration of  
17 the M phase is possibly the reason why the proportion of pH3-positive cells does not exceed 1% in any  
18 of the examined areas in *H. dujardinii* and *L. variabilis*. Indeed, although the lengths of cell cycle phases  
19 vary significantly among different animals, the M phase is always the shortest (e.g., 3-5% of the total  
20 duration of the cell cycle in mammals)<sup>51</sup>.

21 It has been previously shown that choanocytes actively proliferate in intact tissues of  
22 demosponges and calcareous sponges. Still, it is usually stated that the proliferation of choanocytes is  
23 restricted to the self-renewal of the choanoderm and that the mesohyl contains an autonomous  
24 population of cycling cells (e.g., archaeocytes in Demospongiae)<sup>8</sup>. According to Funayama<sup>21</sup>, both  
25 choanocytes and certain mesohyl cells represent distinct types of stem cells, however, choanocytes  
26 display broad stem cell activity only in calcareous and homoscleromorph sponges<sup>8</sup>. In demosponges  
27 and hexactinellids, archaeocytes are thought to be the active stem cells, with choanocytes being the

1 minor component of the stem cell system, transforming into archaeocytes only under specific  
2 circumstances<sup>23</sup>.

3         However, in both *H. dujardinii* and *L. variabilis* (as well as in several other species), EdU-  
4 positive choanocytes outnumber EdU-positive cells in the mesohyl<sup>33,34,38</sup>. Mesohyl cells also account  
5 for the minority of the pH3-positive cells. Therefore, mesohyl hardly contains large population of cycling  
6 cells. Moreover, it should be taken into account that not all observed EdU-positive cells are actually in  
7 the S phase after the prolonged incubation in EdU, since DNA synthesis occurs predominantly in the  
8 choanoderm, it is tempting to assume that some of the EdU-positive cells in the mesohyl could actually  
9 be choanoderm-derived.

10         Our EdU tracking experiment in *H. dujardinii* provided us with additional clues. After the removal  
11 of the EdU from the medium, the proportion of labeled mesohyl cells continuously increased. There are  
12 several ways to interpret this result. It could be that mesohyl cells proliferate much faster than  
13 choanocytes, driving the increase in the proportion of labeled cells. However, rapidly cycling  
14 archaeocytes would have comprised the majority of labeled cells immediately after the treatment with  
15 EdU (i.e., at the initial time point). Thus, there is no evidence that archaeocytes possess short cell cycle.  
16 The proportion of labeled mesohyl cells can also increase due to the loss of EdU-positive choanocytes  
17 through cell shedding. In several species, choanocytes were found to be massively discarded into the  
18 environment<sup>33–35</sup>. Nevertheless, there is little physiological sense in getting rid of newly produced (i.e.,  
19 EdU-positive) cells, as one would expect that old, non-proliferative choanocytes are those that are  
20 predominantly shed. Additionally, extensive cell shedding is characteristic of sponges with high  
21 microbial abundance in their tissues<sup>34</sup>. This should not be the case in *H. dujardinii*, which is a low  
22 microbial abundance sponge<sup>36</sup>. Moreover, we did not observe extensive cell shedding in this species.

23         Instead, we suppose that the label flux in *H. dujardinii* occurs via cell migration (in line with  
24 similar experiments on planarians<sup>52</sup>). Since choanocytes are the main DNA synthesizing population of  
25 cells, the increase in the proportion of EdU-positive mesohyl cells could be a consequence of the  
26 migration of choanocytes (or their progeny) into the mesohyl. Of course, the population of archaeocytes  
27 might be self-renewing to some extent, but the label flux can be interpreted as indirect evidence that  
28 choanocytes contribute to the pool of mesohyl cells. Even if archaeocytes take part in the renewal of

1 the choanoderm, the general tissue dynamics leans towards the opposite direction. The same process  
2 may occur in intact tissues of *L. variabilis*. Although we have not performed pulse-chase experiments  
3 in this species, we hypothesize that the population of amoeboid mesohyl cells in this species is even  
4 more transient and choanocyte-dependent.

5 Therefore, choanocytes are apparently the major part of cycling cells not only in the calcareous  
6 sponge *L. variabilis*, but also in the demosponge *H. dujardinii*. It seems that the proliferation of  
7 choanocytes is not only limited to the renewal of the choanoderm, as it has been previously shown that  
8 choanocytes contribute to gametogenesis<sup>8,53–55</sup>, regeneration<sup>12,14,16</sup> and can express certain stem cell  
9 markers (at least in demosponges and homoscleromorphs)<sup>26,28,56,57</sup>. Additionally, it seems that  
10 choanocytes may also participate in cell turnover through cell migration. Together, this data suggests  
11 that the role of choanocytes in the stem cell system of sponges is underestimated. Choanocytes might  
12 act as a major source of new cells (including cells of mesohyl) in both calcareous sponges and  
13 demosponges during regular cell turnover or growth.

#### 14 ***Apoptotic activity in intact tissues of sponges***

15 Under the steady-state condition, cell proliferation is counterbalanced by the process of cell  
16 elimination. Apoptosis is considered to be the most common way of cell death in animals<sup>3,32,58</sup>. It is a  
17 tightly regulated and complex process resulting in the fragmentation of a dying cell into apoptotic  
18 bodies<sup>31</sup>. Once these apoptotic bodies are engulfed by other cells, neat cell death is reached. It should  
19 be noted that tissues exposed to adverse environments usually display high rates of physiological  
20 turnover (e.g., mammalian epidermis and intestine; gills, intestine and mantles of mollusks; epithelia of  
21 ascidians and cnidarians)<sup>42,58–62</sup>. Given that choanocytes are highly proliferative, we would expect a  
22 significant amount of dying cells.

23 CLSM studies using CellEvent staining indicated that apoptotic rate is rather low in intact  
24 tissues of *H. dujardinii* and *L. variabilis*, with less than 1% of cells containing active effector caspases.  
25 We consider this result to be the most relevant, as it fits well with other known studies on sponges<sup>16,33,34</sup>.  
26 Insignificant number of apoptotic cells was initially thought to indicate the possibility of caspase-  
27 independent cell death in intact sponges. However, low number of apoptotic cells is also characteristic

1 of tissues of other animals under the steady-state condition<sup>63,64</sup>. Thus, we suggest that apoptosis is  
2 involved in regular tissue renewal in sponges.

3       Significantly more CellEvent-positive cells were found in the CMFSW-E suspensions analyzed  
4 using flow cytometry. These cells are small, highly granulated and contain active effector caspases,  
5 thus they demonstrate the classic features of apoptosis<sup>65,66</sup>. Suspensions of *H. dujardinii* contained few  
6 apoptotic cells, whereas CellEvent-positive cells in *L. variabilis* comprised up to 60% of the general  
7 population. SubG1 cells detected by means of DNA content are also important to mention here. These  
8 small, highly granulated cells characterized by fragmented DNA should be considered apoptotic. Since  
9 cell debris and bacteria might also be detected as a SubG1 population, it does not represent an accurate  
10 estimation of the number of apoptotic cells. However, SubG1 cells may serve as indirect and rough  
11 evaluation of the apoptotic activity. The presence of SubG1 cells seems to be an inevitable  
12 consequence of our sample preparation<sup>67</sup>. Yet, the proportion of SubG1 cells differ drastically between  
13 species; CMFSW-E dissociation does not significantly affect *H. dujardinii*, but leads to a massive  
14 transition of *L. variabilis* cells to the SubG1 population. Obviously, CMFSW-E suspensions of *L.*  
15 *variabilis* indicate massive cell death caused by sample preparation, where the apoptotic response  
16 develops quickly within one or two hours. More importantly, this was not the case in suspensions made  
17 using pre-fixed tissues. It seems that dissociation results in the activation of the apoptotic machinery in  
18 cells of *L. variabilis*. Thus, the observed number of CellEvent-positive cells and SubG1-cells in the  
19 suspensions of *L. variabilis* cannot be considered an adequate estimation of the overall apoptotic  
20 activity.

21       The observed interspecific variability of the apoptotic response might be associated with the  
22 phylogenetic position and type of body organization. The majority of the body in *H. dujardinii*  
23 (Demospongiae) is occupied by mesenchymal tissue, and in comparison, *L. variabilis* (Calcarea) is  
24 mainly composed of epithelial-like layers of choanoderm and pinacoderm. Overall, it appears that  
25 calcareous sponges have a more epithelial-like organization, relying on tighter cell-to-cell interactions.  
26 For example, regeneration occurs via blastema formation and mesenchymal morphogeneses in  
27 demosponges, while in calcareous sponges, it depends on the morphallactic reorganization of adjacent  
28 intact tissue through epithelial morphogeneses<sup>11,12,68</sup>. The disruption of the natural system of cell

1 interactions during the CMFSW-E dissociation could lead to the massive induction of apoptotic activity  
2 in calcareous sponges.

3 Certainly, some degree of apoptosis upregulation should be expected in non-fixed suspensions.  
4 Apoptotic cells accounted for 7-8% of the general population in both species during *in vivo* studies;  
5 however, despite the apoptosis upregulation, *in vivo* experiments shed some light on the mechanisms  
6 of apoptosis. In mammalian cells, double staining with TMRE and CellEvent usually reveals the  
7 presence of three populations: 1) intact TMRE+ CE- cells characterized by intact mitochondria; 2) early  
8 apoptotic TMRE- CE- cells, in which mitochondrial transmembrane potential has vanished; and 3) late  
9 apoptotic TMRE- CE+ cells that contain non-functioning mitochondria and active effector caspases<sup>69</sup>.  
10 This situation is typical for mammalian cells since the permeabilization of the inner mitochondrial  
11 membrane is shown to be tightly associated with the mitochondrial outer membrane permeabilization  
12 (MOMP)<sup>63</sup>. In turn, MOMP is the critical event during the apoptotic response, resulting in the release of  
13 some pro-apoptotic proteins from the mitochondrial intermembrane space into the cytoplasm. The most  
14 crucial pro-apoptotic protein is cytochrome c, which is able to bind to cytoplasmic protein APAF1,  
15 forming the apoptosome and beginning to recruit effector caspases<sup>32,70</sup>. In flatworms (*Dugesia*  
16 *dorocephala* and *Schistosoma mansonii*) and echinoderms (*Strongylocentrotus purpuratus* and  
17 *Dendraster excentricus*), the activation of effector caspases is also cytochrome-c dependent<sup>71</sup>. Thus,  
18 active effector caspases in their cells should be detected only after the inner membrane  
19 permeabilization and MOMP. Some invertebrates, however, do not fit into this scenario<sup>72</sup>. In common  
20 model organisms like *Caenorhabditis elegans* and *Drosophila melanogaster*, the activation of effector  
21 caspases is not associated with MOMP. In such cases, the promotion of apoptotic cell death does not  
22 depend on the presence of cytochrome c in the cytoplasm, even if MOMP is present, it is more of a  
23 consequence than a reason for apoptotic response<sup>73,74</sup>.

24 Our data indicates that apoptosis in sponges might resemble the scenario of *C. elegans* and *D.*  
25 *melanogaster*, as significant amounts of TMRE+ CE+ cells have been observed in *H. dujardinii* and *L.*  
26 *variabilis* suspensions. TMRE+ CE+ cells contain active effector caspases but possess well-functioning  
27 mitochondria. Unstained negative control suspensions indicated that the high level of TMRE  
28 fluorescence in these presumably early apoptotic cells is specific: cells of both *H. dujardinii* and *L.*  
29 *variabilis* maintained functional mitochondria during apoptosis. Thus, there is a possibility that the



1 apoptosis in sponge cells is MOMP-independent. Therefore, and in contrast to mammalian cells, the  
2 TMRE- CE- population seen in these two sponges may contain not early apoptotic cells as originally  
3 thought, but represents a population of damaged or dead cells and cell debris. Rare TMRE- CE+ cells  
4 might be interpreted as non-viable, late apoptotic cells with non-functional mitochondria.

## 5 **Conclusions**

6 Here we provide quantitative and spatial analysis of cell proliferation and apoptosis in two  
7 sponges belonging to different classes of Porifera. Intact tissues of *Halisarca dujardini* (Demospongiae)  
8 and *Leucosolenia variabilis* (Calcarea) are highly proliferative, indicating either high rate of growth or  
9 cell turnover. In both species, the most proliferating fraction of cells are choanocytes, with proliferation  
10 occurring evenly throughout areas of the body containing these cells. The proliferation of choanocytes  
11 maintains tissue homeostasis in the choanoderm, and possibly, in the mesohyl/pinacoderm. Further  
12 investigations with *in vivo* cell tracking and *in situ* hybridization are needed to prove if the choanocytes,  
13 or their progeny, actively differentiate into other cell types. The number of apoptotic cells in intact tissues  
14 of both species is low, although it corresponds with the data on other animals. Therefore, we still think  
15 the apoptosis is involved in the maintenance of tissue homeostasis.

16 Our data will serve as a basis for further detailed research of tissue homeostasis in sponges.  
17 While we have an information about spatial distribution and intensity of cell proliferation and apoptosis  
18 for a number of sponge species, many other processes and mechanisms contributing to tissue  
19 homeostasis in sponges remains uncharacterized. Behavior and fate of cell progeny, temporal  
20 characteristics of the proliferation, apoptosis and differentiation, and, finally, the signaling systems  
21 maintaining proliferative potential of choanocytes are the aims of the future study. Altogether, this data  
22 would help us to establish a comprehensive model of tissue dynamics in these basal metazoans.

## 23 **Experimental Procedures**

### 24 ***Sampling and laboratory maintenance***

25 *Halisarca dujardini* (Demospongiae, Chondrillida) and *Leucosolenia variabilis* (Calcarea,  
26 Leucosolenida) were collected in the Kandalaksha Bay in the White Sea near the Pertsov White Sea

1 Biological Station of Lomonosov Moscow State University (66°34' N, 33°08' E) in August 2019 and  
2 2020. Sponges were collected in the upper subtidal zone with the substrate (brown algae *Fucus* and  
3 *Ascophyllum*) and cleared of epifauna. Specimens were kept in laboratory aquariums with running  
4 natural seawater of ambient temperature. Each experiment was carried out on individuals of the same  
5 size collected on the same day. Sponges were kept in open plastic Petri dishes filled with 5 mL of 0.22  
6 µm-filtered seawater (FSW) during the experiments. Petri dishes were kept between 8-12 °C on a  
7 shaker for better stirring and aeration of FSW.

## 8 ***Histological studies of intact tissues***

9 For histological studies, sponge tissues were fixed for 2 hours at 4 °C with 2.5% glutaraldehyde  
10 (Electron Microscopy Science, 16020) and post-fixed for 1 hour at room temperature (RT) with 1% OsO<sub>4</sub>  
11 (Electron Microscopy Science, 19100). Fixation and post-fixation were done in modified 0.1M Na-  
12 Cacodylate buffer (0.1M Na-Cacodylate, 85.55 mM NaCl, 5 mM CaCl<sub>2</sub>, 5 mM MgCl<sub>2</sub>; pH 7.0-7.5). After  
13 the post-fixation, specimens were dehydrated and embedded in Epon/Araldite epoxy embedding media  
14 (Electron Microscopy Science, 13940) according to the standard protocol previously described<sup>12,75</sup>.

15 Semi-thin sections (1 µm) were cut using LKB V and Leica UC6 ultramicrotomes. Sections were  
16 stained with 1% toluidine blue – 0.2% methylene blue mixture for 1-1.5 min at 60 °C and examined with  
17 a Carl Zeiss Axioplan 2 microscope (Carl Zeiss) equipped with an AxioCam HRm (Carl Zeiss) digital  
18 camera and AxioVision 3.1 (Carl Zeiss) software.

## 19 ***Study of cell proliferation with CLSM***

20 We used 5-ethynyl-2'-deoxyuridine (EdU) and Ser10-phosphorylated histone 3 (pH3)  
21 monoclonal antibodies as the markers of cell proliferation. EdU is a nucleoside analog of thymidine,  
22 which incorporates into nuclei of proliferating cells during DNA synthesis, marking cells in the S-phase<sup>76</sup>.  
23 Antibodies were used against phosphorylated histone 3 labeled cells in the late G<sub>2</sub>-phase and M-  
24 phase<sup>77</sup>. To mark the flagella of the choanocytes, we used antibodies against acetylated-α-tubulin.

25 The EdU (Lumiprobe, 10540) stock solution was prepared in dimethyl sulfoxide (DMSO, MP  
26 Biomedicals 196055). Optimal EdU concentration and incubation times were discovered during

1 preliminary studies. *Halisarca dujardini* individuals were incubated in 5 mL of FSW with 200  $\mu$ M EdU  
2 for 12 hours and individuals of *L. variabilis* were incubated in 5 mL of FSW with 20  $\mu$ M EdU for 6 hours.  
3 Sponges kept in 5 mL FSW with 100 or 10  $\mu$ M DMSO served as negative controls, respectively. We  
4 examined eight individuals of *H. dujardini* and six individuals of *L. variabilis*.

5 After the EdU incubation, all individuals were fixed with 4% paraformaldehyde in phosphate-  
6 buffered saline (4% PFA PBS, Carl Roth 0335.2) for 12 hours at 4 °C. Fixed specimens were rinsed  
7 with PBS several times, then they were incubated in 1-3% bovine serum albumin in PBS (BSA, MP  
8 Biomedicals 0216006980) and permeabilized using 0.5% Triton X-100 (Sigma-Aldrich T8787) in PBS.  
9 Click-reaction (visualization of EdU) was performed for 1 hour at RT in a solution of 4 mM CuSO<sub>4</sub>, 10  
10  $\mu$ M Sulfo-Cyanine3 Azide (Lumiprobe A1330) and 20 mg/mL sodium L-ascorbate (Sigma-Aldrich  
11 11140) in PBS. Click-reaction and subsequent manipulations were carried out in the dark. Specimens  
12 were blocked with a blocking solution of 1% BSA, 0.1% gelatin from cold-water fish skin (Sigma-Aldrich  
13 G7041), 0.5% Triton X-100 and 0.05% Tween-20 (Sigma-Aldrich P1379) in PBS and then incubated in  
14 the primary antibodies (Rabbit Anti-phospho-histone H3, Sigma-Aldrich H0412 and Mouse Anti-  
15 acetylated- $\alpha$ -tubulin, Sigma-Aldrich T6793, both diluted 1:1000 in blocking solution) overnight at 4 °C.  
16 Afterwards, specimens were rinsed twice with the blocking solution and treated with the secondary  
17 antibodies (Donkey anti-Mouse IgG Alexa Fluor 488, ThermoFisher Scientific A21202 and Donkey anti-  
18 Rabbit IgG Alexa Fluor 647, ThermoFisher Scientific A-31573 in blocking solution, both with a final  
19 concentration 1  $\mu$ g/mL) overnight at 4 °C. Cell nuclei were stained with 4',6-diamidino-2-phenylindole  
20 (DAPI, Acros 202710100) in PBS (final concentration 2  $\mu$ g/mL). Spicules of *L. variabilis* were dissolved  
21 using 5% ethylenediaminetetraacetic acid (EDTA) in distilled water for 30 min at RT. Finally, specimens  
22 rinsed with PBS were mounted in 90% glycerol (MP Biomedicals 193996) with 2.5% 1,4-  
23 diazabicyclo[2.2.2]octane (DABCO, Sigma-Aldrich D27802) and studied using a confocal laser  
24 scanning microscope.

25 Cell proliferation was studied in several body regions of the sponges. Three regions were  
26 studied in *H. dujardini*: 1) the endosome adjacent to an oscular tube (n=8); 2) the endosome at some  
27 distance (approximately half the body radius) from an oscular tube (n=8); and 3) the oscular tube (n=4).  
28 Seven regions were studied in *L. variabilis*: 1) the oscular rim (n=10); 2) the distal part of the oscular  
29 tube (n=10); 3) the middle part of the oscular tube (n=10); 4) the proximal part of the oscular tube (n=10);

1 5) the distal part of the diverticulum (n=14); 6) the proximal part of the diverticulum (n=14); and 7) the  
2 cornus tube (n=11). Studied fields of view within each region were chosen randomly. For subsequent  
3 analysis, Z-stacks were obtained from each field of view.

4 Z-stacks were obtained by CLSM (Nikon A1, Nikon, Shinagawa, Japan) using lasers of  
5 wavelength 405 nm (DAPI), 488 nm (Mouse Anti-acetylated- $\alpha$ -tubulin ABI + DAM IgG Alexa Fluor 488  
6 ABII), 561 nm (EdU + Sulfo-Cyanine3 Azide) and 648 nm (Rabbit Anti-phospho-histone H3 ABI + DAR  
7 IgG Alexa Fluor 647). All Z-stacks were obtained with a 1- $\mu$ m Z-step, 48  $\mu$ m (*H. dujardinii*) and 68 (*L.*  
8 *variabilis*)  $\mu$ m thick on average.

9 During subsequent Z-stack analysis, we estimated the total fraction of EdU- and pH3-positive  
10 nuclei (as a proportion of EdU-/pH3-positive nuclei to all nuclei stained with DAPI), the fractions of EdU-  
11 and pH3-positive choanocytes and mesohyl cells (as a proportion of EdU-/pH3-positive  
12 choanocytes/mesohyl cells to all nuclei stained with DAPI) and the fraction of choanocytes among all  
13 EdU/pH3-positive cells (as a proportion of EdU-/pH3-positive choanocytes to all EdU-/pH3-positive  
14 cells).

15 Z-stack analysis was performed using Bitplane Imaris v7.2.1 software. Each stack of *H.*  
16 *dujardinii* and *L. variabilis* contained 6000-7000 and 2000-4000 cells, respectively. Choanocytes were  
17 identified by the presence of flagella and the characteristic shape of the choanoderm/choanocyte  
18 chambers. Mesohyl cells were separated from choanocytes via the «Surface» tool. Cells of interest  
19 (e.g., EdU- or pH3-positive cells) were counted by the «Spots» tool. We combined automatic  
20 identification of nuclei via Quality/Intensity Median thresholds with manual correction of spots. This  
21 counting procedure implies 3D visualization of an entire Z-stack and allows us to precisely distinguish  
22 between labeled cells of choanoderm and mesohyl.

### 23 ***EdU tracking in Halisarca dujardinii***

24 Intact *H. dujardinii* individuals were incubated in 5 mL of FSW with 200  $\mu$ M EdU for 12 hours  
25 and then transferred into a running seawater aquarium. Sponges incubated in 5 mL of FSW with 100  
26  $\mu$ L of DMSO were used as negative controls. Sponges were fixed with 4% PFA PBS on day 1, 5 and 7  
27 after being transferred into aquariums (3, 3 and 5 individuals, respectively). Individuals fixed

1 immediately after the EdU incubation served as the initial time point, day 0. All specimens were treated  
2 for CLSM studies as described above (see “Study of cell proliferation with CLSM” section), but no  
3 antibody staining was performed in this experiment. We studied areas of the endosome at some  
4 distance from an oscular tube. One randomly chosen field of view within the region was analyzed in  
5 each individual. For subsequent analyses, a Z-stack was obtained from each field of view. We estimated  
6 the fractions of choanocytes and mesohyl cells among all EdU-positive cells (as a proportion of EdU-  
7 positive choanocytes/mesohyl cells to all EdU-positive cells). As a result, the main parameter of the  
8 analysis was the mean proportion of choanocytes and mesohyl cells in the total number of EdU-positive  
9 cells. Details of data acquisition, nuclei counting and further analysis have been described above (see  
10 “Study of cell proliferation with CLSM” section). In this experiment, choanocyte chambers were identified  
11 by their characteristic shape visualized by DAPI staining.

## 12 ***Evaluation of cell cycle distribution***

13 We combined calcium and magnesium-free seawater (20 mM KCl, 300 mM NaCl, 10 mM Tris-  
14 HCl and 15 mM EDTA in distilled water) (CMFSW-E) and mechanical tissue dissociation to obtain  
15 single-cell suspensions. Sponges were cleaned of epifauna, soaked in CMFSW-E for 30 min and  
16 squeezed into CMFSW-E through a sterile gauze with a mesh size of 30  $\mu$ m. After 30 min, suspensions  
17 were centrifuged and resuspended in a new aliquot of CMFSW-E. After another 30 min, suspensions  
18 were fixed with 70% cold ethanol at -20 °C. Unfortunately, this dissociation technique yielded a poor-  
19 quality cell cycle curve in *L. variabilis* and an alternative fixation method was required. The new  
20 dissociation technique used intact pieces of *L. variabilis*, which were first fixed in cold 70% ethanol.  
21 After the fixation, tissues were soaked in CMFSW-E and mechanically dissociated through gauze with  
22 a mesh size of 30  $\mu$ m.

23 Cell suspensions from five specimens of *H. dujardinii* and five specimens of *L. variabilis* were  
24 studied for cell cycle distribution, using propidium-iodide (PI) staining since PI fluorescence is  
25 proportional to DNA content<sup>37</sup>. Cell suspensions were resuspended in PBS and stained with 1  $\mu$ g/mL  
26 PI (P1304MP, ThermoFisher Scientific) for at least 12 hours. Unstained suspensions served as a  
27 negative control. Suspensions were analyzed by a FACSAria SORP instrument (BD Biosciences, USA)  
28 using an excitation laser wavelength of 561 nm (PI excitation); 50 000 events were collected per sample.

1 All collected data was processed using FlowJo V10. Primary gating was performed according to forward  
2 (FCS-A) versus side scatter (SSC-A) parameters; secondary gating on singlet cells according to FSC-  
3 W versus FSC-H parameters.

4 To obtain cell cycle distributions, we used the internal FlowJo CellCycle plugin. The Watson  
5 model approximates the DNA content curve as the sum of two Gaussian distributions represented by  
6 G0/G1 and G2/M cells, considering cells between them as cells in the S phase. In most cases, standard  
7 parameters were used. When the G2/M peak was hard to distinguish, we constrained its position  
8 depending on the relative positions of the G0/G1 and G2/M peaks. No CV constraint was performed.

### 9 ***Investigation of apoptotic activity in intact tissues***

10 Tetramethylrhodamine ethyl ester (TMRE, ThermoFisher Scientific, T669) and CellEvent  
11 Caspase-3/7 Green ReadyProbes Reagent (ThermoFisher Scientific, R37111) (CellEvent) were used  
12 as markers of apoptotic activity for both CLSM and flow cytometry studies. The absence of TMRE  
13 fluorescence serves as a sign of mitochondrial inner membrane permeabilization, which is characteristic  
14 of the early stages of apoptosis. CellEvent is an indicator of activated effector caspases present in cells  
15 during the middle and late stages of apoptosis<sup>63</sup>. In each experiment, we used unstained specimens as  
16 negative controls.

17 *CellEvent staining of intact tissues for CLSM.* Specimens (3 sponges per species) were  
18 incubated in 1 mL of FSW with CellEvent (dilution 1:100) for 2 hours at 10 °C in the dark. After the  
19 incubation they were fixed with 4% PFA PBS. Then specimens were fixed with 4% PFA PBS, washed  
20 with PBS and blocking solution for several hours, and stained with DAPI as described above (see “Study  
21 of cell proliferation with CLSM” section). Specimens of *L. variabilis* were stained with acetylated- $\alpha$ -  
22 tubulin antibodies to identify choanocytes. In *H. dujardinii*, no antibody staining was performed and  
23 choanocyte chambers were identified by characteristic shape of choanocyte chambers visualized by  
24 DAPI staining. During this experiment, we used lasers of 405 nm (DAPI), 488 nm (CellEvent) and 648  
25 nm (Mouse Anti-acetylated- $\alpha$ -tubulin ABI + DAM IgG Alexa Fluor 647 ABII) wavelengths. Details of data  
26 acquisition and nuclei counting are provided in the “Study of cell proliferation with CLSM” section. Any  
27 nuclei displaying bright CellEvent staining was considered apoptotic. During the analysis, we estimated

1 the total fraction of CellEvent-positive cells (as a proportion of CellEvent-positive nuclei to all nuclei  
2 labeled with DAPI) and the proportion of choanocytes/mesohyl cells among all CellEvent-positive cells  
3 (as a proportion of CellEvent-positive choanocytes/mesohyl cells to all CellEvent-positive cells).

4 *CellEvent staining of suspensions for flow cytometry.* We took samples (250 mL) containing  
5  $1.5 \times 10^6$  cells from non-fixed CMFSW-E suspensions of *H. dujardinii* and *L. variabilis* (4 samples from  
6 4 sponges per species). The suspensions were obtained as described in the “Evaluation of cell cycle  
7 distribution” section. The samples were incubated in CellEvent (dilution 1:100) at 10 °C for 30 min in  
8 the dark. Samples were then centrifuged and fixed with 4% PFA PBS at 4 °C and stored for 2 months.  
9 Prior to analyses by flow cytometry, cells were washed three times with PBS. All suspensions were  
10 analyzed by a FACSAria SORP instrument (BD Biosciences, USA) using an excitation laser wavelength  
11 of 488 nm (CellEvent excitation). Primary gating was as described above (see the “Evaluation of cell  
12 cycle distribution in intact tissues” section); the final quadrant gating to distinguish CellEvent-positive  
13 cells was set according to the unstained control. Any event exceeding the autofluorescence of the  
14 unstained control was considered a CellEvent-positive (apoptotic) cell. Subsequent flow cytometry  
15 studies showed that *L. variabilis* suspensions contained an anomaly high number of CellEvent-positive  
16 (apoptotic) cells. Thus, the data obtained from these samples were not used in the main analysis.

17 *Vital staining of suspensions for CLSM and flow cytometry.* For vital CLSM studies, the  
18 suspensions were obtained as described in the “Evaluation of cell cycle distribution” section.  
19 Suspensions were stained with TMRE (final concentration - 100  $\mu$ M), CellEvent (dilution 1:100) and  
20 Hoechst 33342 (dilution 1:100) at 10 °C for 30 min in the dark. During this experiment, we used lasers  
21 of wavelength 405 nm (DAPI), 488 nm (CellEvent) and 561 nm (TMRE). Data acquisition was the same  
22 as previously described above (see “Study of cell proliferation with CLSM” section). No quantitative  
23 analysis was performed; acquired images were used to illustrate flow cytometry data.

24 For the vital flow cytometry study, three individuals of *H. dujardinii* (August 2020) and two  
25 individuals of *L. variabilis* (February 2020) were transported to Moscow in thermoses filled with natural  
26 seawater at 10 °C. Sponges were dissociated in CMFSW-E for 30 min and stained with TMRE and  
27 CellEvent as previously described. After staining, the suspensions were analyzed using a FACSAria  
28 SORP instrument (BD Biosciences, USA) with an excitation laser wavelength of 488 nm (CellEvent

1 excitation) and 561 nm (TMRE excitation). Primary gating was as described above (see the “Evaluation  
2 of cell cycle distribution in intact tissues” section). The final quadrant gating to distinguish between  
3 different cell populations was performed according to the unstained control. Any event exceeding the  
4 autofluorescence of the unstained control was considered a TMRE/CellEvent-positive cell.

## 5 ***Statistical analysis and plotting***

6 Statistical analysis and plotting were performed in GraphPad PRISM v8.0.1. Mean values and  
7 standard deviations were calculated for every parameter (the proportions of EdU-positive cells, pH3-  
8 positive cells, etc.). To compare these parameters between different body parts or time points, we used  
9 Kruskal-Waltes test followed by Dunn test since it is a distribution-free test appropriate for multiple  
10 comparisons between small data subsets. The significance level was 0.05. All p-values represented in  
11 the text are Dunn test p-values. Tables with exact p-values for all tests are provided in the Mendeley  
12 Data root directory (see “Availability of data and material” section).

## 13 **Acknowledgments**

14 The authors acknowledge the support of Lomonosov Moscow State University Program of  
15 Development (FACSAria SORP flow cytometer/sorter, Nikon A1 CLSM) and Center of microscopy  
16 WSBS MSU. Authors sincerely thank Darya Potashnikova (Lomonosov Moscow State University) for  
17 operating the flow cytometer, Daniyal Saidov (Lomonosov Moscow State University), for statistical  
18 analysis tips, Vitaly Kozin and Alexandra Shalaeva (Saint-Petersburg State University) for helping with  
19 Bitplane Imaris, Olga Vorobjeva (Lomonosov Moscow State University), for collection and transporting  
20 *L. variabilis* individuals for the *in vivo* apoptosis investigation, Igor Kosevich (Lomonosov Moscow State  
21 University) and Ilya Borisenko (Saint-Petersburg State University) for helpful tips and advice. Authors  
22 also thanks Brett C. Gonzales (Smithsonian National Museum of Natural History) for his invaluable help  
23 with English language corrections.

## 24 **Authors’ contributions**

25 NM, AL and AS designed the study. NM, AL, FB, KS and VF collected the material, carried out  
26 CLSM proliferation studies and analyzed data in Bitplane Imaris. NM conducted experiments and



1 analyzed data from the pulse-chase EdU studies, apoptosis investigations in intact tissues, DNA content  
2 and apoptosis evaluation in cell suspensions, and performed the statistical analysis. AL, NM, AE and  
3 AS prepared the manuscript with contributions from all authors. All authors reviewed and approved the  
4 final manuscript.

## 5 **Availability of data and materials**

6 The draft dataset supporting the conclusions of this article is available in the Mendeley Data  
7 repository, [https://data.mendeley.com/datasets/hhmc8t6gv7/draft?a=ee1a45f9-2b2d-4b65-b863-](https://data.mendeley.com/datasets/hhmc8t6gv7/draft?a=ee1a45f9-2b2d-4b65-b863-ec4e84785263)  
8 [ec4e84785263](https://data.mendeley.com/datasets/hhmc8t6gv7/draft?a=ee1a45f9-2b2d-4b65-b863-ec4e84785263) (*H.dujardinii*; doi:10.17632/hhmc8t6gv7.1) and  
9 <https://data.mendeley.com/datasets/vbk6h8vcyy/draft?a=97e2ee7f-68e0-455f-b36b-2ad25872ff9a> (*L.*  
10 *variabilis*; doi:10.17632/vbk6h8vcyy.1).

## 11 **List of abbreviations**

12 FSW - filtered seawater  
13 EdU - 5-ethynyl-2'-deoxyuridine  
14 pH3 - Ser10-phosphorylated histone 3  
15 DMSO - dimethyl sulfoxide  
16 PFA - paraformaldehyde  
17 PBS - phosphate-buffered saline  
18 CMFSW-E - calcium and magnesium-free seawater  
19 TMRE - tetramethylrhodamine ethyl ester  
20 CellEvent or CE - Caspase-3/7 Green ReadyProbes™ Reagent  
21 PI - propidium iodide  
22 CLSM - confocal laser scanning microscopy

1 MOMP - mitochondrial outer membrane permeabilization

## 2 **References**

- 3 1. Galliot B, Ghila L. Cell plasticity in homeostasis and regeneration. *Mol Reprod Dev.*  
4 2010;77(10):837-855. doi:10.1002/mrd.21206
- 5 2. Tanaka EM, Reddien PW. The Cellular Basis for Animal Regeneration. *Dev Cell.*  
6 2011;21(1):172-185. doi:10.1016/j.devcel.2011.06.016
- 7 3. Pellettieri J, Alvarado AS. Cell Turnover and Adult Tissue Homeostasis: From Humans  
8 to Planarians. *Annu Rev Genet.* 2007;41(1):83-105. doi:10.1146/annurev.genet.41.110306.130244
- 9 4. Sharpless NE, DePinho RA. Telomeres, stem cells, senescence, and cancer. *J Clin*  
10 *Invest.* 2004;113(2):160-168. doi:10.1172/JCI20761
- 11 5. Pardal R, Clarke MF, Morrison SJ. Applying the principles of stem-cell biology to  
12 cancer. *Nat Rev Cancer.* 2003;3(12):895-902. doi:10.1038/nrc1232
- 13 6. Wörheide G, Dohrmann M, Erpenbeck D, et al. *Deep Phylogeny and Evolution of*  
14 *Sponges (Phylum Porifera)*. Vol 61.; 2012. doi:10.1016/B978-0-12-387787-1.00007-6
- 15 7. Leys SP, Hill A. The Physiology and Molecular Biology of Sponge Tissues. *Adv Mar*  
16 *Biol.* 2012;62:1–56. doi:10.1016/B978-0-12-394283-8.00001-1
- 17 8. Ereskovsky AV. *The Comparative Embryology of Sponges*. Springer Science &  
18 Business Media; 2010 Mar 27. doi:10.1007/978-90-481-8575-7
- 19 9. Simpson TL. *The Cell Biology of Sponges*; Springer Science & Business Media; 2012  
20 Dec 6. doi:10.1007/978-1-4612-5214-6
- 21 10. Gaino E, Manconi R, Pronzato R. Organizational plasticity as a successful conservative  
22 tactics in sponges. *Anim Biol.* 1995;4:31-43

- 1           11.     Korotkova G. *Regeneration in animals*. Saint-Petersburg: Saint-Petersburg University  
2     Press. 1997
- 3           12.     Lavrov AI, Bolshakov FV., Tokina DB, Ereskovsky AV. Sewing up the wounds : The  
4     epithelial morphogenesis as a central mechanism of calcareous sponge regeneration. *J Exp Zool Part*  
5     *B Mol Dev Evol*. 2018;330(6-7):351-371. doi:10.1002/jez.b.22830
- 6           13.     Lavrov AI, Kosevich IA. Sponge cell reaggregation: Mechanisms and dynamics of the  
7     process. *Russ J Dev Biol*. 2014;45(4):205-223. doi:10.1134/S1062360414040067
- 8           14.     Borisenko IE, Adamska M, Tokina DB, Ereskovsky AV. Transdifferentiation is a driving  
9     force of regeneration in *Halisarca dujardini* (Demospongiae, Porifera). *PeerJ*. 2015;2015(8).  
10    doi:10.7717/peerj.1211
- 11          15.     Ereskovsky AV., Borisenko IE, Lapébie P, et al. *Oscarella lobularis*  
12     (Homoscleromorpha, Porifera) Regeneration: Epithelial morphogenesis and metaplasia. *PLoS One*.  
13     2015;10(8):1-28. doi:10.1371/journal.pone.0134566
- 14          16.     Ereskovsky AV., Tokina DB, Saidov DM, Baghdiguian S, Le Goff E, Lavrov AI.  
15     Transdifferentiation and mesenchymal-to-epithelial transition during regeneration in Demospongiae  
16     (Porifera). *J Exp Zool Part B Mol Dev Evol*. 2020;334(1):37-58. doi:10.1002/jez.b.22919
- 17          17.     Alexander BE, Achlatis M, Osinga R, et al. Cell kinetics during regeneration in the  
18     sponge *Halisarca caerulea*: How local is the response to tissue damage? *PeerJ*. 2015;2015(3):e820.  
19     doi:10.7717/peerj.820
- 20          18.     Bond C. Continuous cell movements rearrange anatomical structures in intact sponges.  
21     *J Exp Zool*. 1992;263(3):284-302. doi:10.1002/jez.1402630308
- 22          19.     Bond C, Harris AK. Locomotion of sponges and its physical mechanism. *J Exp Zool*.  
23     1988;246(3):271-284. doi:10.1002/jez.1402460307
- 24          20.     Lavrov AI, Kosevich IA. Stolonial movement: A new type of whole-organism behavior  
25     in Porifera. *Biol Bull*. 2018;234(1):58-67. doi:10.1086/697113

- 1           21.     Funayama N. The cellular and molecular bases of the sponge stem cell systems  
2 underlying reproduction, homeostasis and regeneration. *Int J Dev Biol.* 2018;62(6-8):513-525.  
3 doi:10.1387/ijdb.180016nf
- 4           22.     Ereskovsky A.V. Stem cells cell in sponges (Porifera): an update. *ISJ-INVERTEBRATE*  
5 *SURVIVAL JOURNAL.* 2019;16:62-63. doi:10.25431/1824-307X/isj.v0i0.60-65
- 6           23.     Funayama N. The stem cell system in demosponges: Suggested involvement of two  
7 types of cells: Archeocytes (active stem cells) and choanocytes (food-entrapping flagellated cells). *Dev*  
8 *Genes Evol.* 2013;223(1-2):23-38. doi:10.1007/s00427-012-0417-5
- 9           24.     Sebé-Pedrós A, Chomsky E, Pang K, et al. Early metazoan cell type diversity and the  
10 evolution of multicellular gene regulation. *Nat Ecol Evol.* 2018;2(7):1176-1188. doi:10.1038/s41559-  
11 018-0575-6
- 12          25.     Sogabe S, Hatleberg WL, Kocot KM, et al. Pluripotency and the origin of animal  
13 multicellularity. *Nature.* 2019;570(7762):519-522. doi:10.1038/s41586-019-1290-4
- 14          26.     Fierro-Constaín L, Schenkelaars Q, Gazave E, et al. The conservation of the germline  
15 multipotency program, from sponges to vertebrates: A stepping stone to understanding the somatic and  
16 germline origins. *Genome Biol Evol.* 2017;9(3):474-488. doi:10.1093/gbe/evw289
- 17          27.     Alié A, Hayashi T, Sugimura I, et al. The ancestral gene repertoire of animal stem cells.  
18 *Proc Natl Acad Sci U S A.* 2015;112(51):E7093-E7100. doi:10.1073/pnas.1514789112
- 19          28.     Okamoto K, Nakatsukasa M, Alié A, Masuda Y, Agata K, Funayama N. The active stem  
20 cell specific expression of sponge Musashi homolog EflMsiA suggests its involvement in maintaining  
21 the stem cell state. *Mech Dev.* 2012;129(1-4):24-37. doi:10.1016/j.mod.2012.03.001
- 22          29.     Böttger A, Alexandrova O. Programmed cell death in *Hydra*. *Semin Cancer Biol.*  
23 2007;17(2):134-146. doi:10.1016/j.semcancer.2006.11.008

- 1           30.     Bursch W, Ellinger A, Gerner C, Fröhwein U, Schulte-Hermann R. Programmed cell  
2 death (PCD) apoptosis, autophagic PCD, or others? Vol. 926, *Annals of the New York Academy of*  
3 *Sciences*. 2000.
- 4           31.     Edinger AL, Thompson CB. Death by design: Apoptosis, necrosis and autophagy. *Curr*  
5 *Opin Cell Biol*. 2004;16(6):663-669. doi:10.1016/j.ceb.2004.09.011
- 6           32.     Elmore S. Apoptosis: A Review of Programmed Cell Death. *Toxicol Pathol*.  
7 2007;35(4):495-516. doi:10.1080/01926230701320337
- 8           33.     Degoeij JM, De Kluijver A, Van Duyl FC, et al. Cell kinetics of the marine sponge  
9 *Halisarca caerulea* reveal rapid cell turnover and shedding. *J Exp Biol*. 2009;212(23):3892-3900.  
10 doi:10.1242/jeb.034561
- 11          34.     Alexander BE, Liebrand K, Osinga R, et al. Cell turnover and detritus production in  
12 marine sponges from tropical and temperate benthic ecosystems. *PLoS One*. 2014;9(10).  
13 doi:10.1371/journal.pone.0109486
- 14          35.     Maldonado M. Sponge waste that fuels marine oligotrophic food webs: a re-  
15 assessment of its origin and nature. *Mar Ecol*. 2016;37(3):477-491. doi:10.1111/maec.12256
- 16          36.     Ereskovsky A V., Lavrov D V., Boury-Esnault N, Vacelet J. Molecular and  
17 morphological description of a new species of *Halisarca* (Demospongiae: Halisarcida) from  
18 Mediterranean Sea and a redescription of the type species *Halisarca dujardini*. *Zootaxa*. 2011;(2768):5-  
19 31. doi:10.11646/zootaxa.2768.1.2
- 20          37.     Pozarowski P, Darzynkiewicz Z. *Analysis of Cell Cycle by Flow Cytometry*. Vol 281.;  
21 2004. doi:10.1385/1-59259-811-0:301
- 22          38.     Kahn AS, Leys SP. The role of cell replacement in benthic-pelagic coupling by  
23 suspension feeders. *R Soc Open Sci*. 2016;3(11). doi:10.1098/rsos.160484
- 24          39.     Holstein TW, David CN. Cell cycle length, cell size, and proliferation rate in *Hydra* stem  
25 cells. *Dev Biol*. 1990;142(2):392-400. doi:10.1016/0012-1606(90)90360-U

- 1           40.     Ladurner P, Rieger R, Baguñà J. Spatial distribution and differentiation potential of  
2 stem cells in hatchlings and adults in the marine platyhelminth *Macrostomum sp.*: a bromodeoxyuridine  
3 analysis. *Dev Biol.* 2000;226(2):231-241. doi:10.1006/dbio.2000.9867
- 4           41.     Kang H, Alvarado AS. Flow cytometry methods for the study of cell-cycle parameters  
5 of planarian stem cells. *Dev Dyn.* 2009;238(5):1111-1117. doi:10.1002/dvdy.21928
- 6           42.     Strahl J, Abele D. Cell turnover in tissues of the long-lived ocean quahog *Arctica*  
7 *islandica* and the short-lived scallop *Aequipecten opercularis*. *Mar Biol.* 2010;157(6):1283-1292.  
8 doi:10.1007/s00227-010-1408-6
- 9           43.     Shunatova N, Borisenko I. Proliferating activity in a bryozoan lophophore. *PeerJ.*  
10 2020;2020(5):1-32. doi:10.7717/peerj.9179
- 11          44.     Rinkevich B, Shlemberg Z, Fishelson L. Whole-body protochordate regeneration from  
12 totipotent blood cells. *Proc Natl Acad Sci U S A.* 1995;92(17):7695-7699. doi:10.1073/pnas.92.17.7695
- 13          45.     Martínez-Expósito MJ, Pasantes JJ, Méndez J. Proliferation kinetics of mussel (*Mytilus*  
14 *galloprovincialis*) gill cells. *Mar Biol.* 1994;120(1):41-45. doi:10.1007/BF00381940
- 15          46.     Bosch TCG. Stem cells in immortal *Hydra*. In: *Stem Cells: From Hydra to Man.* ;  
16 2008:37-57. doi:10.1007/978-1-4020-8274-0\_3
- 17          47.     Zaldibar B, Cancio I, Marigómez I. Circatidal variation in epithelial cell proliferation in  
18 the mussel digestive gland and stomach. *Cell Tissue Res.* 2004;318(2):395-402. doi:10.1007/s00441-  
19 004-0960-0
- 20          48.     Fang Z, Feng Q, Chi Y, Xie L, Zhang R. Investigation of cell proliferation and  
21 differentiation in the mantle of *Pinctada fucata* (Bivalve, Mollusca). *Mar Biol.* 2008;153(4):745-754.  
22 doi:10.1007/s00227-007-0851-5
- 23          49.     Dor Y, Brown J, Martinez OI, Melton DA. Adult pancreatic  $\beta$ -cells are formed by self-  
24 duplication rather than stem-cell differentiation. *Nature.* 2004;429(6987):41-46.  
25 doi:10.1038/nature02520

- 1           50.     Gold DA, Jacobs DK. Stem cell dynamics in Cnidaria: Are there unifying principles?  
2     *Dev Genes Evol.* 2013;223(1-2):53-66. doi:10.1007/s00427-012-0429-1
- 3           51.     Uzbekov RE. Review: Analysis of the cell cycle and a method employing synchronized  
4     cells for study of protein expression at various stages of the cell cycle. *Biokhimiya.* 2004;69(5):597-611.
- 5           52.     Van Wolfswinkel JC, Wagner DE, Reddien PW. Single-cell analysis reveals functionally  
6     distinct classes within the planarian stem cell compartment. *Cell Stem Cell.* 2014;15(3):326-339.  
7     doi:10.1016/j.stem.2014.06.007
- 8           53.     Anakina RP, Drozdov AL. Gamete Structure and Fertilization in the Barents Sea  
9     Sponge *Leucosolenia complicata.* *Russ J Mar Biol.* 2001;27(3):143-150.  
10    doi:10.1023/A:1016761317637
- 11          54.     Anakina R, Korotkova G. Spermatogenesis in *Leucosolenia complicata* Mont., Barents  
12    Sea sponge. *Ontogenez.* 1989;20:77–86.
- 13          55.     Korotkova G, Aizenshtadt T. Study of oogenesis of marine sponge *Halisarca dujardinii.*  
14    1. Origin of oogonia and early stages of oocyte development. *Tsitologiya.* Published online 2001.
- 15          56.     Funayama N, Nakatsukasa M, Mohri K, Masuda Y, Agata K. Piwi expression in  
16    archeocytes and choanocytes in demosponges: Insights into the stem cell system in demosponges.  
17    *Evol Dev.* 2010;12(3):275-287. doi:10.1111/j.1525-142X.2010.00413.x
- 18          57.     Sogabe S. The biology of choanocytes and choanocyte chambers and their role in the  
19    sponge stem cell system. *PhD Thesis.* Published online 2017:165pp.
- 20          58.     Lasi M, David CN, Böttger A. Apoptosis in pre-Bilaterians: *Hydra* as a model.  
21    *Apoptosis.* 2010;15(3):269-278. doi:10.1007/s10495-009-0442-7
- 22          59.     Post Y, Clevers H. Defining Adult Stem Cell Function at Its Simplest: The Ability to  
23    Replace Lost Cells through Mitosis. *Cell Stem Cell.* 2019;25(2):174-183.  
24    doi:10.1016/j.stem.2019.07.002

- 1           60.     David CN, Campbell RD. Cell Cycle Kinetics and Development of *Hydra Attenuata*. I.  
2     Epithelial Cells. *J Cell Sci*. 1972;11:557–68.
- 3           61.     Tiozzo S, Ballarin L, Burighel P, Zaniolo G. Programmed cell death in vegetative  
4     development: Apoptosis during the colonial life cycle of the ascidian *Botryllus schlosseri*. *Tissue Cell*.  
5     2006;38(3):193-201. doi:10.1016/j.tice.2006.02.003
- 6           62.     Eckhart L, Lippens S, Tschachler E, Declercq W. Cell death by cornification. *Biochim*  
7     *Biophys Acta - Mol Cell Res*. 2013;1833(12):3471-3480. doi:10.1016/j.bbamcr.2013.06.010
- 8           63.     Wolf, S., Ikeda, H., Matin, S., Debroy, M., Rajaraman, S., Herndon, D., & Thompson,  
9     J. (1999). Cutaneous burn increases apoptosis in the gut epithelium of mice. *J Am Coll*  
10    *Surg*. 1999;188(1), 10-16. [https://doi.org/10.1016/S1072-7515\(98\)00260-9](https://doi.org/10.1016/S1072-7515(98)00260-9)
- 11          64.     Pellettieri, J., Fitzgerald, P., Watanabe, S., Mancuso, J., Green, D. R., & Sánchez  
12     Alvarado, A. Cell death and tissue remodeling in planarian regeneration. *Dev Biol*. 2010;338(1), 76–85.  
13     <https://doi.org/10.1016/j.ydbio.2009.09.015>
- 14          65.     Vorobjev I, Barteneva NS. Temporal Heterogeneity Metrics in Apoptosis Induced by  
15     Anticancer Drugs. *J Histochem Cytochem*. 2015;63(7):494-510. doi:10.1369/0022155415583534
- 16          66.     Barteneva NS, Ponomarev ED, Tsytsykova A, Armant M, Vorobjev IA. Mitochondrial  
17     Staining Allows Robust Elimination of Apoptotic and Damaged Cells during Cell Sorting. *J Histochem*  
18     *Cytochem*. 2014;62(4):265-275. doi:10.1369/0022155413520404
- 19          67.     Schippers KJ, Martens DE, Pomponi SA, Wijffels RH. Cell cycle analysis of primary  
20     sponge cell cultures. *Vitr Cell Dev Biol - Anim*. 2011;47(4):302-311. doi:10.1007/s11626-011-9391-x
- 21          68.     Ereskovsky A V., Renard E, Borchiellini C. Cellular and molecular processes leading  
22     to embryo formation in sponges: Evidences for high conservation of processes throughout animal  
23     evolution. *Dev Genes Evol*. 2013;223(1-2):5-22. doi:10.1007/s00427-012-0399-3
- 24          69.     Vorobjev IA, Barteneva NS. *Imaging Flow Cytometry Methods and Protocols*. Vol  
25     1389.; 2016. doi:10.1007/978-1-4939-3302-0



- 1           70.     Tait SWG, Green DR. Mitochondria and cell death: Outer membrane permeabilization  
2     and beyond. *Nat Rev Mol Cell Biol.* 2010;11(9):621-632. doi:10.1038/nrm2952
- 3           71.     Bender CE, Fitzgerald P, Tait SWG, et al. Mitochondrial pathway of apoptosis is  
4     ancestral in metazoans. *Proc Natl Acad Sci U S A.* 2012;109(13):4904-4909.  
5     doi:10.1073/pnas.1120680109
- 6           72.     Oberst A, Bender C, Green DR. Living with death: The evolution of the mitochondrial  
7     pathway of apoptosis in animals. *Cell Death Differ.* 2008;15(7):1139-1146. doi:10.1038/cdd.2008.65
- 8           73.     Zimmermann KC, Ricci JE, Droin NM, Green DR. The role of ARK in stress-induced  
9     apoptosis in Drosophila cells. *J Cell Biol.* 2002;156(6):1077-1087. doi:10.1083/jcb.20112068
- 10          74.     Breckenridge DG, Kang BH, Kokel D, Mitani S, Staehelin LA, Xue D. *Caenorhabditis*  
11     *elegans* drp-1 and fis-2 Regulate Distinct Cell-Death Execution Pathways Downstream of ced-3 and  
12     Independent of ced-9. *Mol Cell.* 2008;31(4):586-597. doi:10.1016/j.molcel.2008.07.015
- 13          75.     Ereskovsky A, Lavrov A. Porifera. In: *Invertebrate Histology*, 2021:19-54.  
14     doi:10.1002/9781119507697.ch2
- 15          76.     Buck SB, Bradford J, Gee KR, Agnew BJ, Clarke ST, Salic A. Detection of S-phase cell  
16     cycle progression using 5-ethynyl-2'- deoxyuridine incorporation with click chemistry, an alternative to  
17     using 5-bromo-2'-deoxyuridine antibodies. *Biotechniques.* 2008;44(7):927-929.  
18     doi:10.2144/000112812
- 19          77.     Henzel MJ, Wei Y, Mancini MA, et al. Mitosis-specific phosphorylation of histone H3  
20     initiates primarily within pericentromeric heterochromatin during G2 and spreads in an ordered fashion  
21     coincident with mitotic chromosome condensation. *Chromosoma.* 1997;106(6):348-360.  
22     doi:10.1007/s004120050256

23

24

## 1 Figures

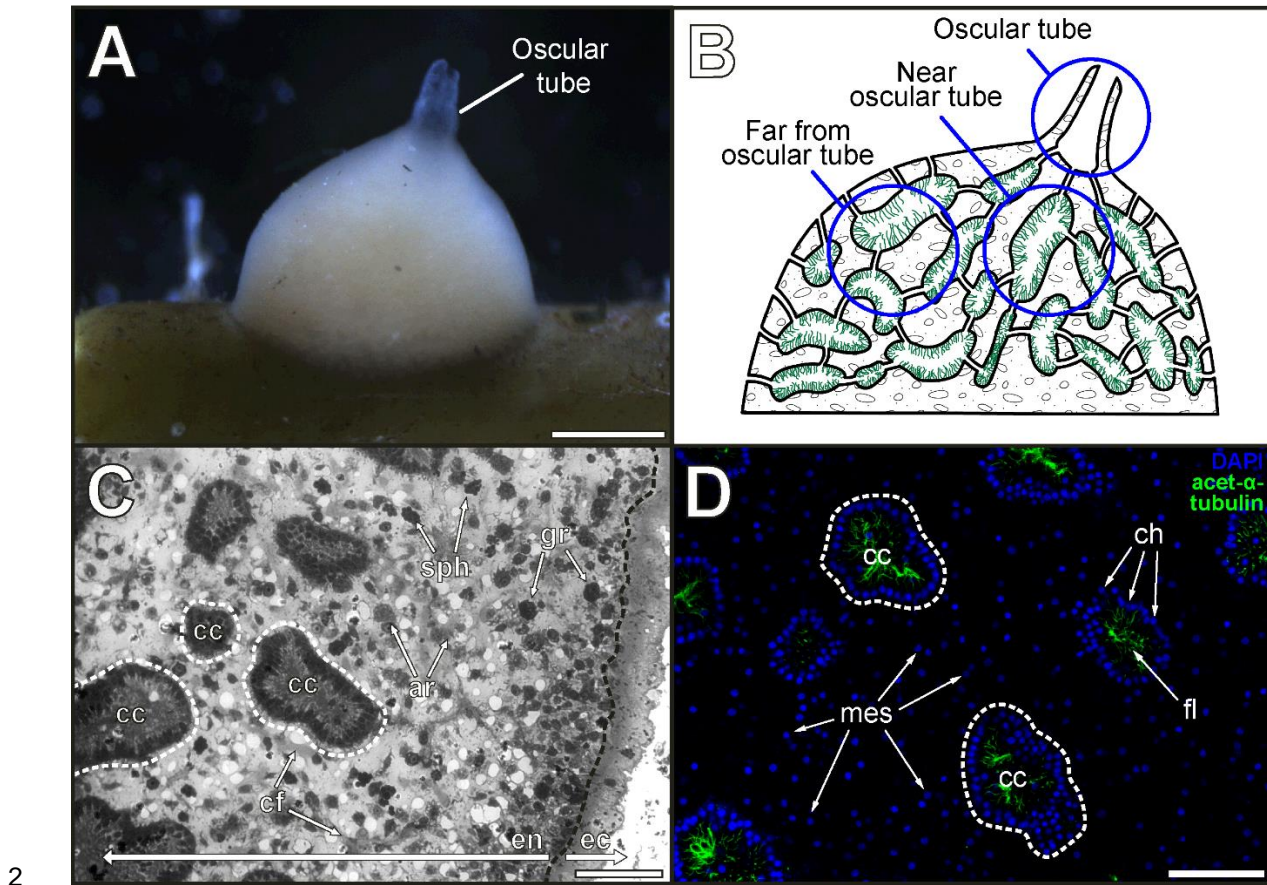

2

3 **Figure 1.** Anatomy and histology of *Halisarca dujardini*. A – general appearance; B – schematic  
4 drawing of the aquiferous system representing regions of interest; C – section through the endosome  
5 and ectosome using light microscopy; D – area of the endosome distant from the oscular tube, CLSM  
6 (maximum intensity projection of several focal planes); blue color – DAPI, cell nuclei; green – acetylated  
7  $\alpha$ -tubulin, flagella. Black dotted line marks the border between the ecto- and endosome. White dotted  
8 lines mark the borders of several choanocyte chambers. ar – archaeocyte, cc – choanocyte chamber,  
9 cf – collagen fiber, en – endosome, ec – ectosome, fl – flagella, gr – granular cell, mes – nucleus of  
10 mesohyl cell, sph – spherulous cell. Scale bars: A – 1 mm, C, D – 50  $\mu$ m.

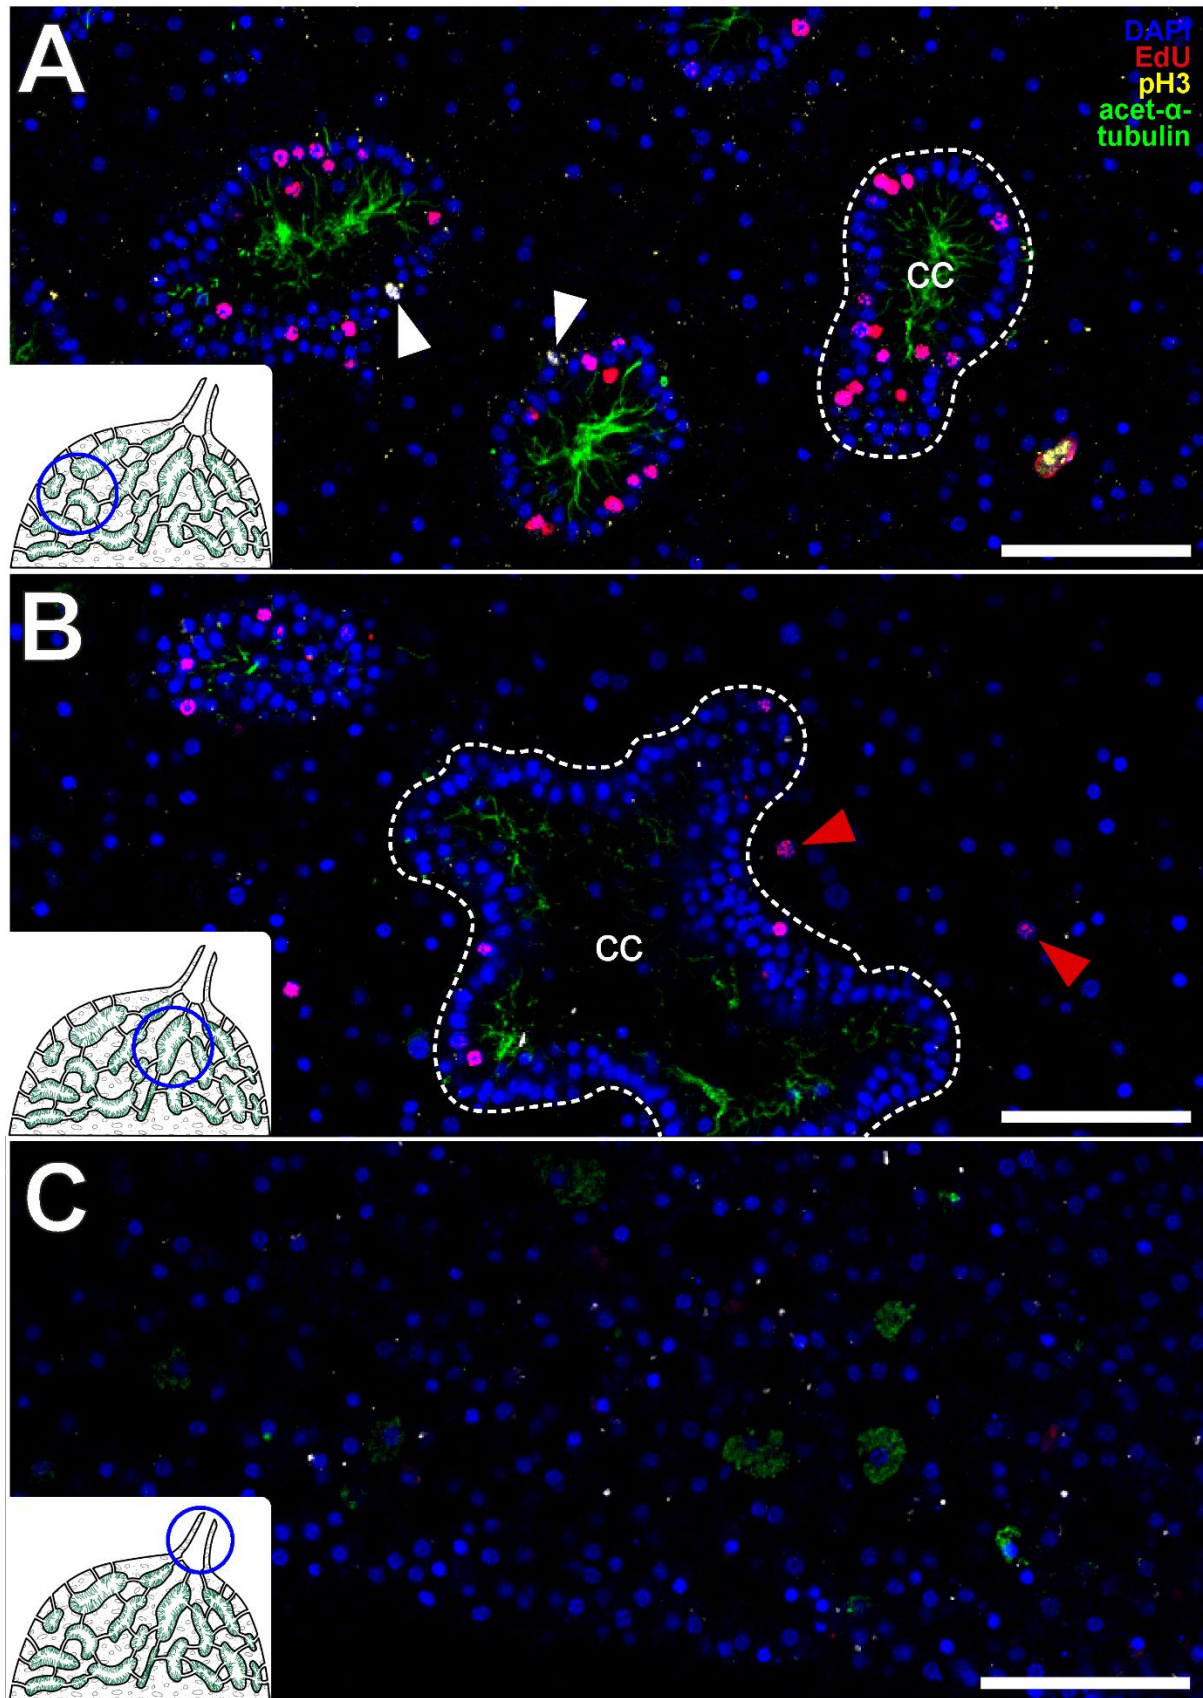

1  
2 **Figure 2.** Cell proliferation in different body regions of *Halisarca dujardini*, CLSM. A - endosome distant  
3 from the oscular tube; B - endosome adjacent to the oscular tube; C – the oscular tube. All images are

1 maximum intensity projections of several focal planes. Insets schematically show position of the studied  
2 regions in the sponge body. Blue color – DAPI, cell nuclei; red – EdU, nuclei of DNA synthesizing cells;  
3 yellow – pH3, chromatin of late G2/M cells; green – acetylated  $\alpha$ -tubulin, flagella. Dotted lines mark the  
4 borders of choanocyte chambers. White arrowheads mark cells in the M-phase of the cell cycle; red  
5 arrowheads mark EdU-positive cells outside the choanocyte chambers. cc - choanocyte chambers  
6 (outlined by the dotted lines). Scale bars: A, B, C - 50  $\mu$ m.

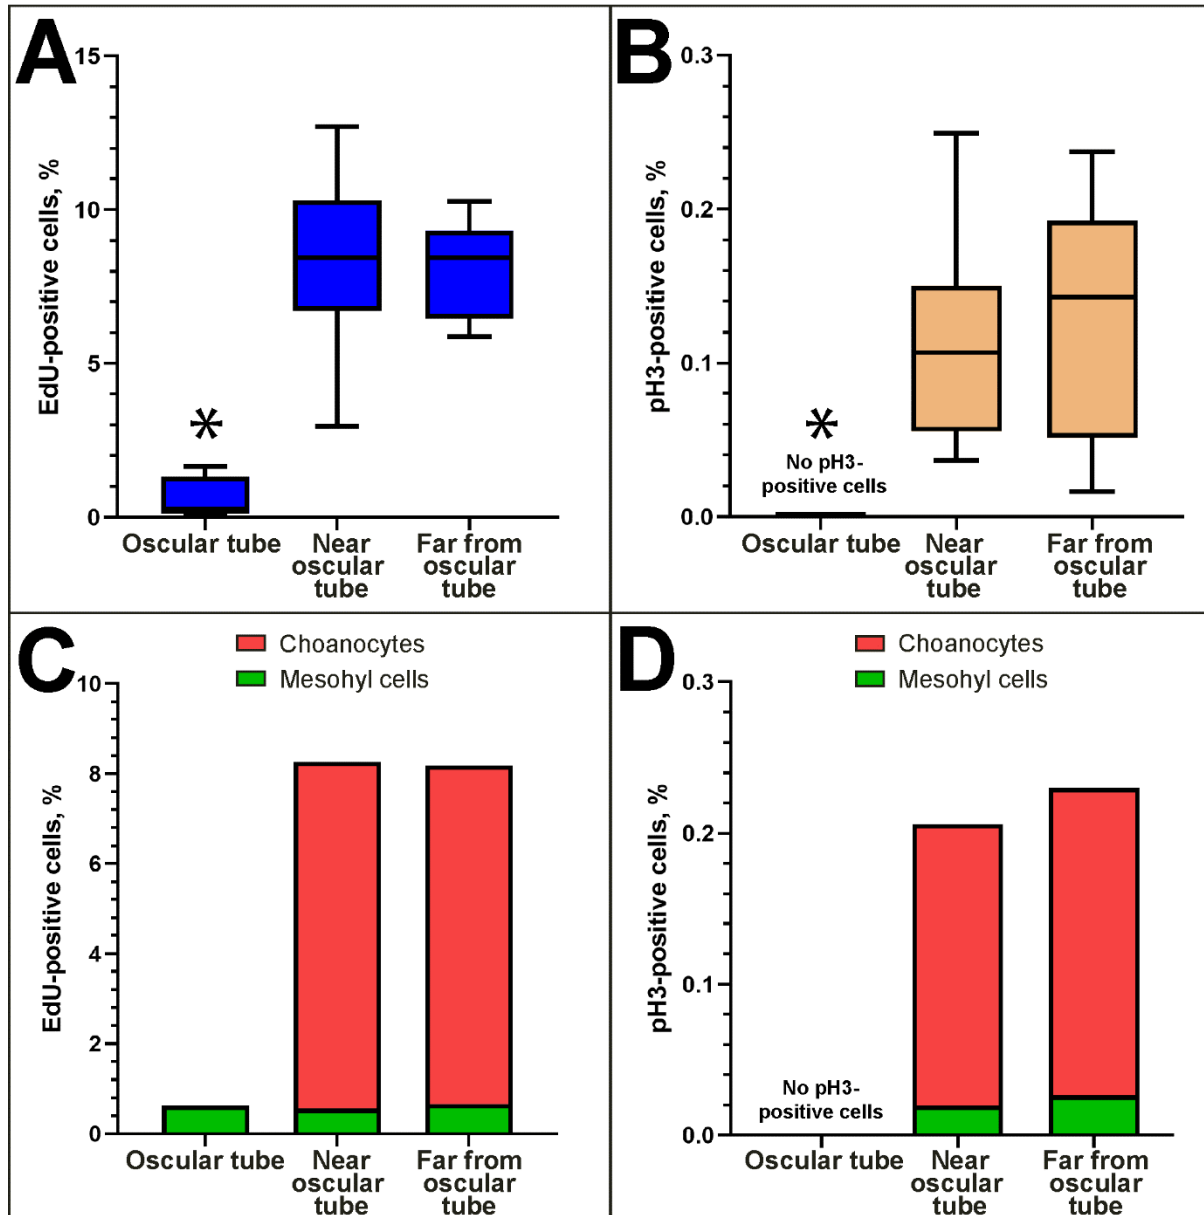

7  
8 **Figure 3.** Quantitative analysis of cell proliferation in intact tissues of *Halisarca dujardinii*. A, B - fractions  
9 of EdU- (A) and pH3-positive (B) cells in different body regions. Data is shown with median values (thick  
10 horizontal lines), interquartile ranges (boxes), total ranges (whiskers) and outliers (dots). Asterisks mark

- 1 significantly different regions of the body. C, D – fractions (mean values) of choanocytes/mesohyl cells
- 2 among the total number of EdU- (C) and pH3-positive (D) cells.

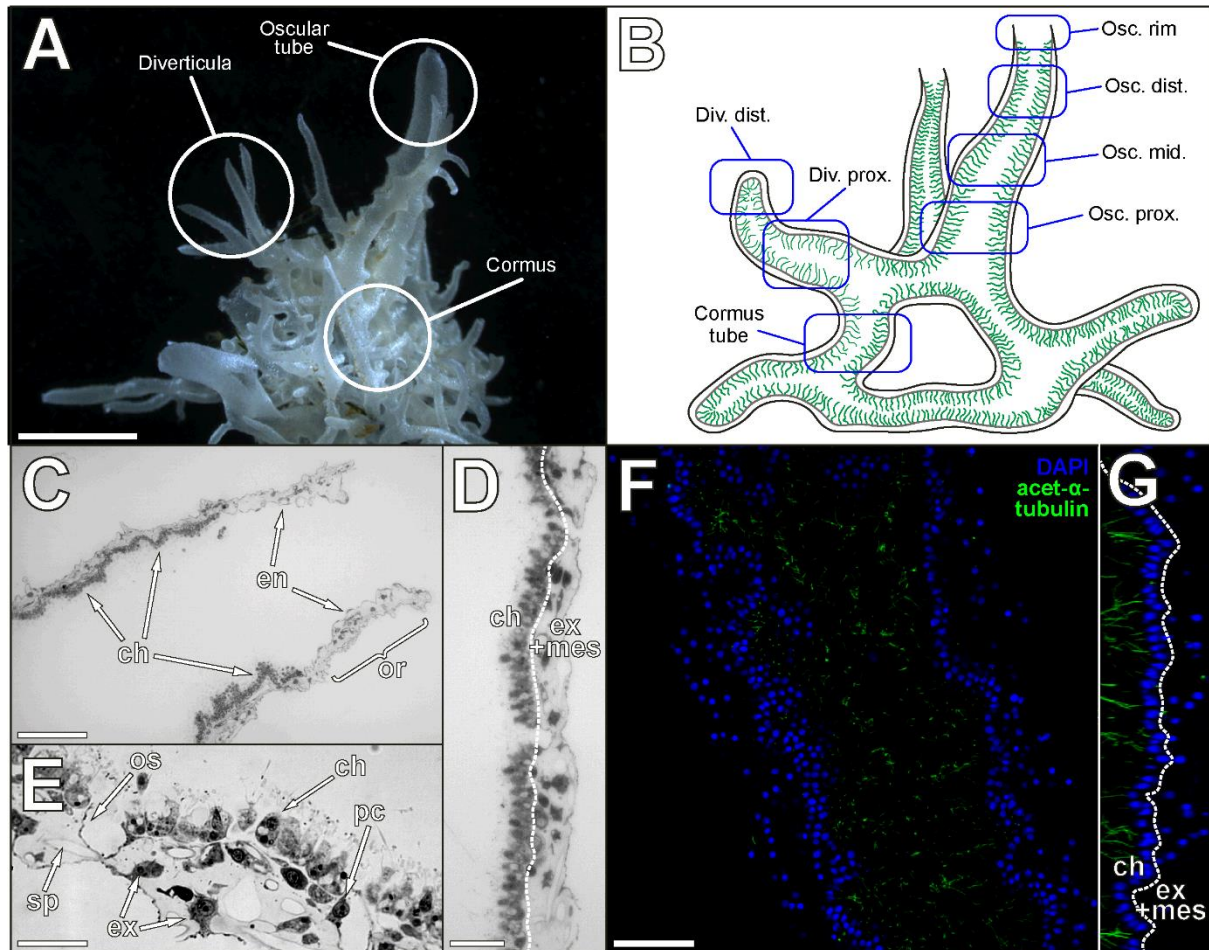

3  
4 **Figure 4.** Anatomy and histology of *Leucosolenia variabilis*. A – general appearance; B – schematic  
5 drawing of the aquiferous system representing regions of interest; C – longitudinal section through the  
6 distal part of the oscular tube (including the oscular rim), light microscopy; D, E – cross sections through  
7 the middle part of the oscular tube, light microscopy; F – the proximal part of the diverticulum, CLSM  
8 (maximum intensity projection of several focal planes); G – orthogonal XZ projection of the same Z-  
9 stack, CLSM (maximum intensity projection of several focal planes); blue color – DAPI, cell nuclei; green  
10 – acetylated  $\alpha$ -tubulin, flagella. Osc. rim – the oscular rim; Osc. dist - distal part of the oscular tube;  
11 Osc. mid. - middle part of the oscular tube; Osc. prox. - proximal part of the oscular tube; Div. dist. -  
12 distal part of the diverticulum; Div. prox. - proximal part of the diverticulum; Cormus tube - cormus tube.  
13 ch – choanoderm; en – endopinacocytes, ex – exopinacocytes; ex+mes – exopinacoderm/mesohyl  
14 layer; or – oscular rim; os – ostium; pc – porocyte; sp – spicule. Dotted lines mark the borders between

- 1 the choanoderm and exopinacoderm/mesohyl layers. Scale bars: A – 0.2 mm; C, D – 50  $\mu$ m; E – 25  
2  $\mu$ m; F – 50  $\mu$ m.

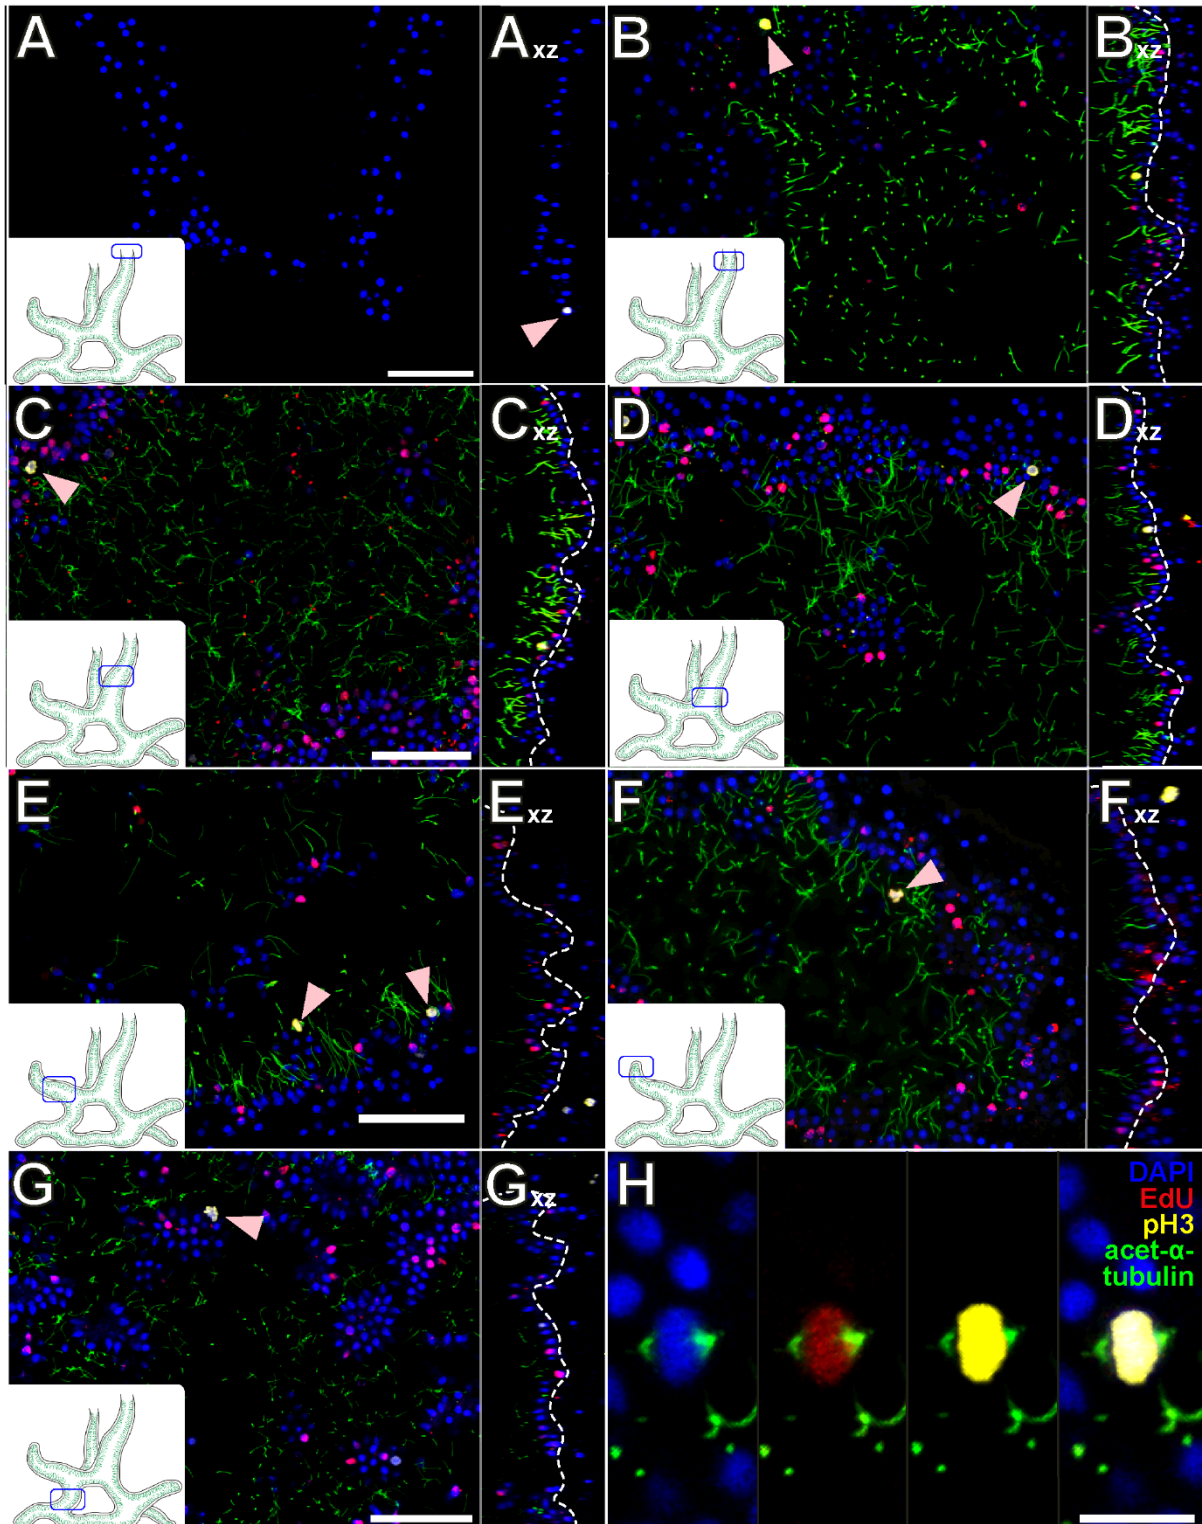

- 3  
4 **Figure 5.** Cell proliferation in different body regions of *Leucosolenia variabilis*, CLSM. A – oscular rim;  
5 B – the distal part of an oscular tube; C - the middle part of an oscular tube; D - the proximal part of an

1 oscular tube; E - the proximal part of a diverticulum; F - the distal part of a diverticulum; G - a cornus  
 2 tube; E – metaphase plate in the choanoderm of the middle part of the oscular tube. Images with the  
 3 “xz” index represent XZ orthogonal projections of the respective Z-stack. All images are maximum  
 4 intensity projections of several focal planes. Insets schematically show position of the studied regions  
 5 in the sponge body. Blue color – DAPI, cell nuclei; red – EdU, nuclei of DNA synthesizing cells; yellow  
 6 – pH3, chromatin of late G2/M cells; green – acetylated  $\alpha$ -tubulin, flagella. Arrowheads mark cells in the  
 7 M-phase of the cell cycle. Scale bars: A, B, C, D, E, F, G – 50  $\mu$ m.

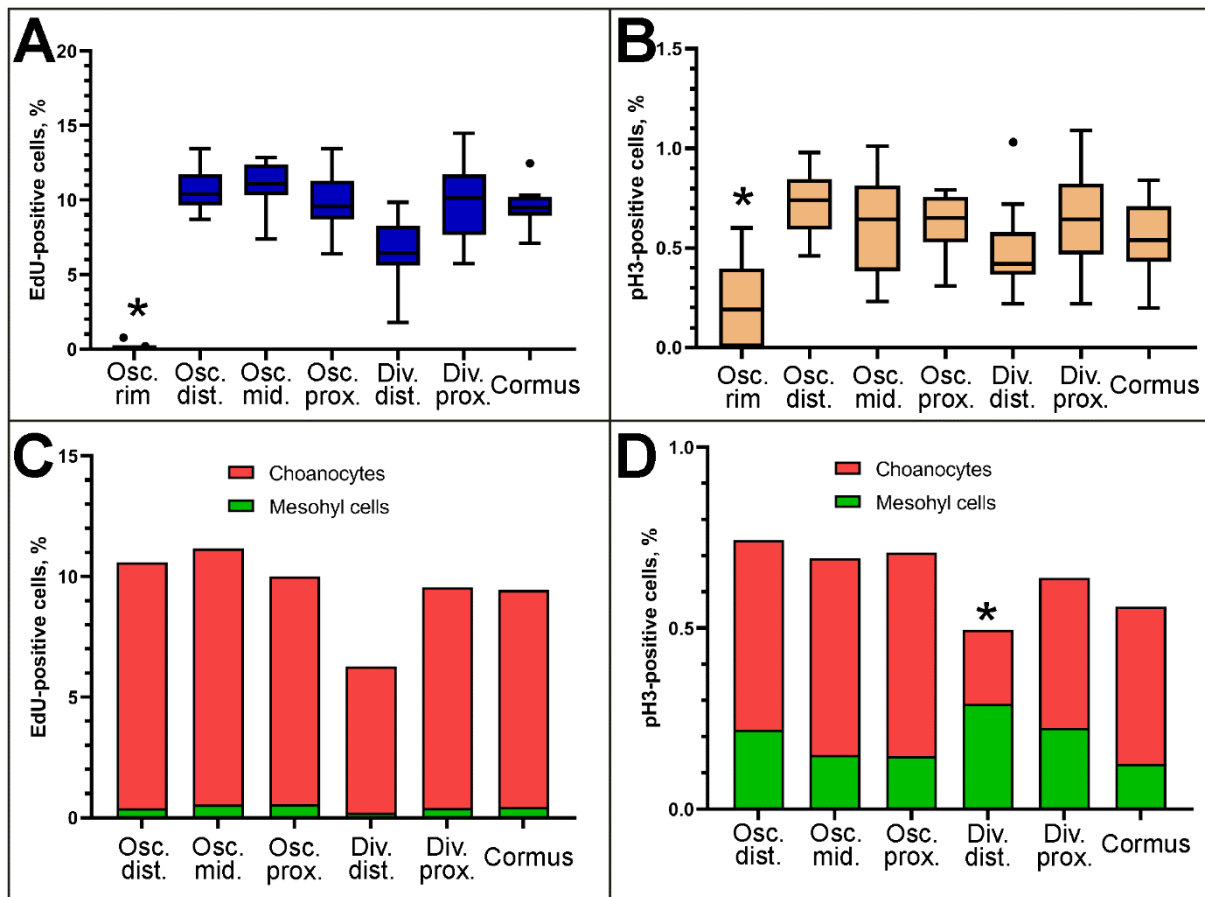

8  
 9 **Figure 6.** Quantitative analysis of cell proliferation in different body regions of *Leucosolenia variabilis*.  
 10 A, B - fractions of EdU- (A) and pH3-positive (B) cells in different body regions. Data is shown with  
 11 median values (thick horizontal lines), interquartile ranges (boxes), total ranges (whiskers) and outliers  
 12 (dots). C, D – fractions (mean values) of choanocytes/mesohyl cells among the total number of EdU-  
 13 (C) and pH3-positive (D) cells, respectively. Asterisks mark significantly different regions of the body.  
 14 Osc. rim - oscular rim; Osc. dist - distal part of an oscular tube; Osc. mid. - middle part of an oscular  
 15 tube; Osc. prox. - proximal part of an oscular tube; Div. dist. - distal part of a diverticulum; Div. prox. -  
 16 proximal part of a diverticulum; Cornus - cornus tube.

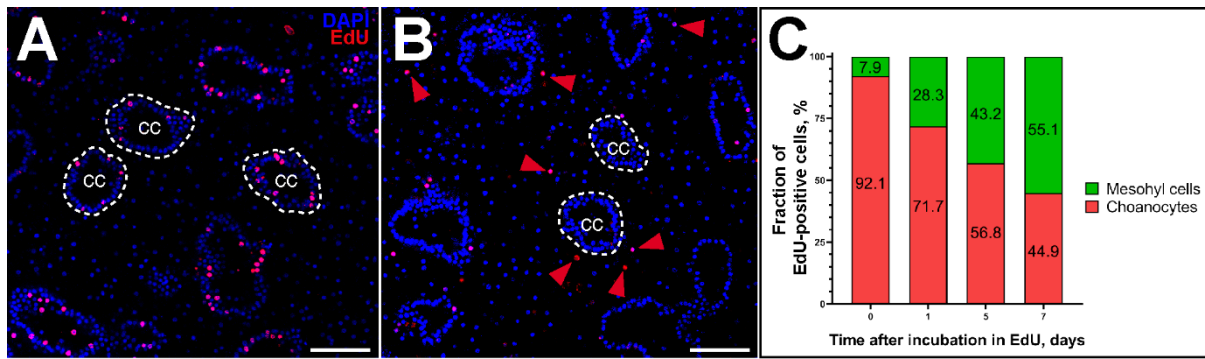

1  
2 **Figure 7.** EdU tracking experiment in *Halisarca dujardini*, CLSM. A - 0 days after the incubation in EdU  
3 (maximum intensity projection of several focal planes); B - 7 days after the incubation in EdU (maximum  
4 intensity projection of several focal planes); blue color – DAPI, cell nuclei, red – EdU, nuclei of DNA  
5 synthesizing cells. C - fractions of labeled choanocytes and mesohyl cells among all EdU-positive cells  
6 (mean values). Dotted lines mark the borders of choanocyte chambers. Arrowheads in B mark EdU-  
7 positive nuclei in the mesohyl. Scale bars: A, B - 50  $\mu$ m.

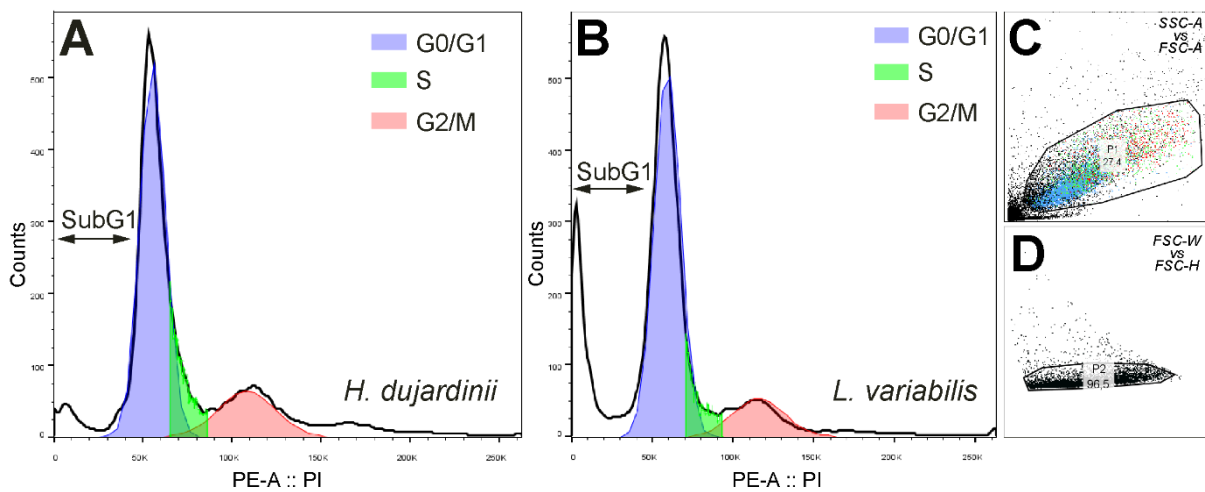

8  
9 **Figure 8.** Single-parameter histograms of PI fluorescence (DNA content) in *Halisarca dujardini* (A) and  
10 *Leucosolenia variabilis* (B) cell suspensions; C, D – an example of light-scatter primary gating to  
11 distinguish single cells in a suspension of *L. variabilis*. G0/G1 (red) are diploid cells, G2/M (blue) are  
12 tetraploid cells, S (green) are DNA-synthesizing cells. SubG1 cells are cells with fragmented DNA.



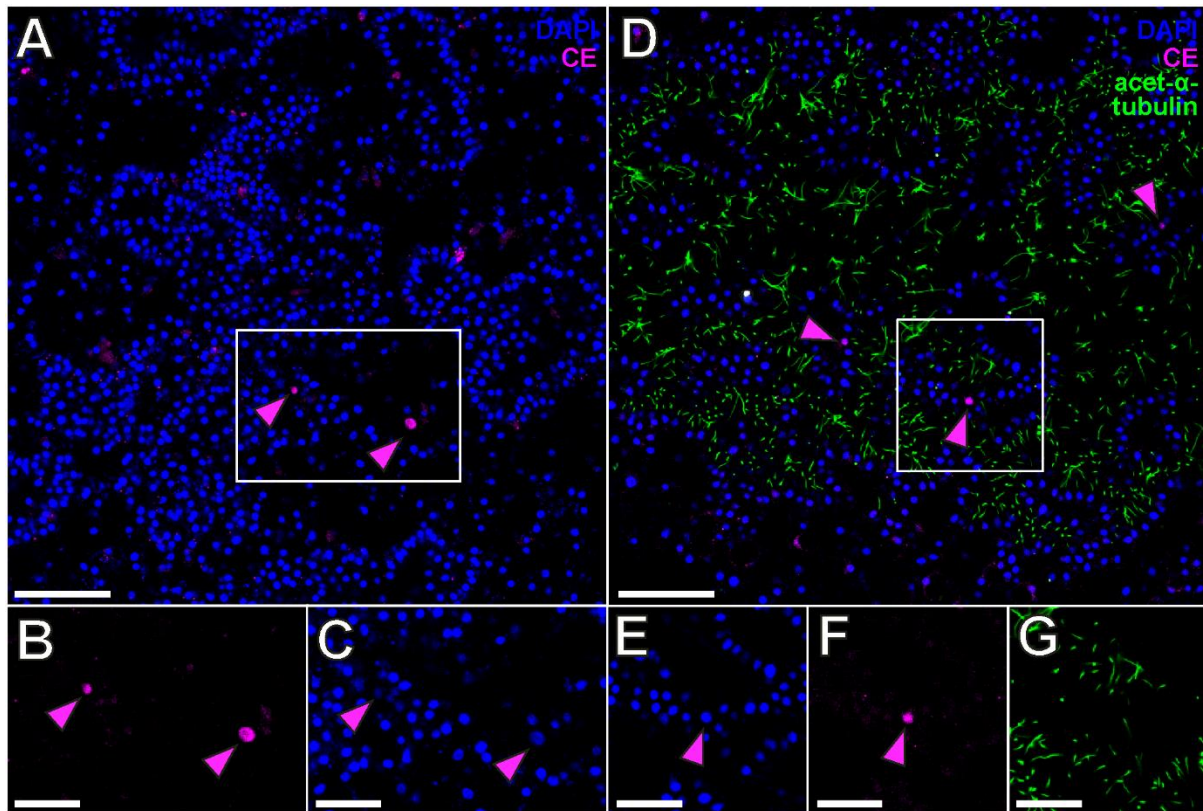

1  
2 **Figure 9.** Apoptosis in intact tissues of *Halisarca dujardini* and *Leucosolenia variabilis*, CLSM. A – the  
3 endosome of *H. dujardini*; B, C – enlarged single-channel images of the zone in the white rectangle in  
4 A; D – the proximal part of the oscular tube of *L. variabilis*; E, F, G – enlarged single-channel images of  
5 the zone in the white rectangle in D. Several focal planes are combined into one picture. Blue color –  
6 DAPI, cell nuclei; magenta – CellEvent, nuclei of apoptotic cells; green – acetylated  $\alpha$ -tubulin, flagella.  
7 Magenta arrowheads mark CellEvent-positive cells. Scale bars: A, D - 50  $\mu\text{m}$ ; B, C, E, F, G - 25  $\mu\text{m}$ .

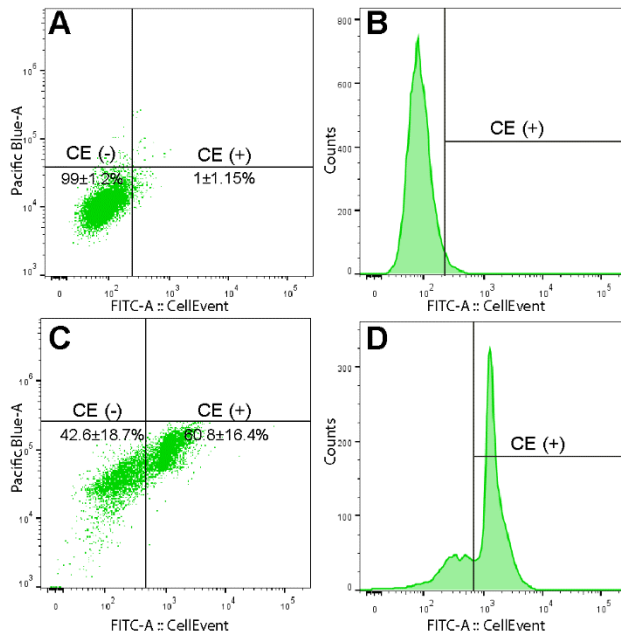

1

2 **Figure 10.** Apoptosis in cell suspensions of *Halisarca dujardini* (A, B) and *Leucosolenia variabilis* (C,  
 3 D), flow cytometry. A, C - Pacific Blue-A (autofluorescence) vs FITC-A (CE fluorescence) dot plots; B,  
 4 D – single-parameter histograms of CellEvent fluorescence. CE(+) population gate is set according to  
 5 the negative control.

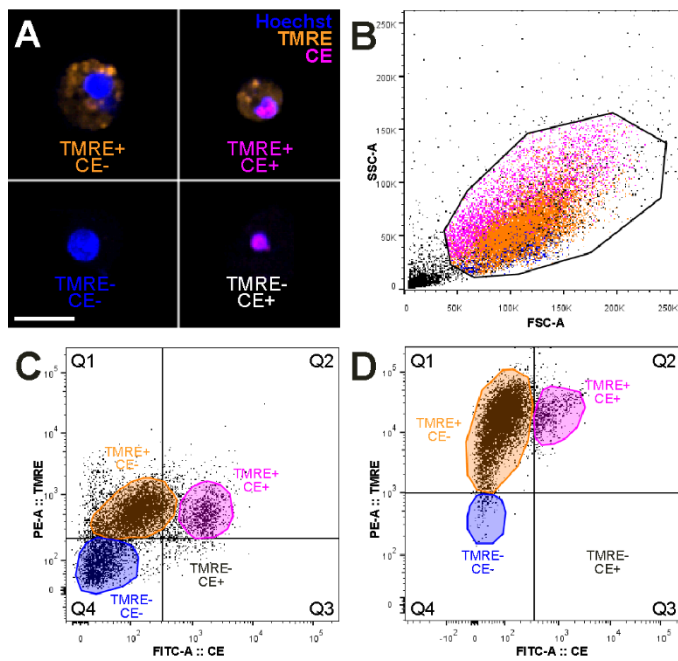

6

7 **Figure 11.** *In vivo* TMRE and CellEvent staining of *Halisarca dujardini* and *Leucosolenia variabilis*  
 8 suspensions. A - CLSM of *L. variabilis* suspension, scale bar 10  $\mu$ m; blue color - Hoechst 33342, cell  
 9 nuclei; orange - TMRE, functional mitochondria; magenta - CellEvent, nuclei of apoptotic cells; B -

- 1 scatter plot of FSC-A (cell size) vs SSC-A (cell granularity), an example of primary gating; C, D - TMRE
- 2 vs CellEvent dot plot of *L. variabilis* (C) and *H. dujardinii* (D) suspensions. The borders of quadrants
- 3 (Q1-Q4) are set by the negative controls.
- 4

1 **Tables**

2 **Table 1.** Fractions of proliferating cells in intact tissues of *Halisarca dujardinii*, CLSM.

| <b>Body region</b>                                            | <b>Distant from the oscular tube</b> | <b>Adjacent to the oscular tube</b> | <b>Oscular tube</b>     |
|---------------------------------------------------------------|--------------------------------------|-------------------------------------|-------------------------|
| <b>n</b>                                                      | 8                                    | 8                                   | 4                       |
| <b>Fraction of EdU-positive cells among all cells</b>         | 8.10±1.64%                           | 8.44±3.08%                          | 0.61±0.64%              |
| <b>Fraction of EdU-positive choanocytes among all cells</b>   | 7.39±1.52%                           | 7.76±3.03%                          |                         |
| <b>Fraction of EdU-positive mesohyl cells among all cells</b> | 0.71±0.56%                           | 0.68±0.32%                          |                         |
| <b>Fraction of choanocytes among EdU-positive cells</b>       | 92.08±6.11%                          | 90.27±7.03%                         |                         |
| <b>Fraction of pH3-positive cells among all cells</b>         | 0.11±0.07%                           | 0.11±0.07%                          | No pH3-cells were found |
| <b>Fraction of pH3-positive choanocytes among all cells</b>   | 0.10±0.06%                           | 0.10±0.06%                          |                         |
| <b>Fraction of pH3-positive mesohyl cells among all cells</b> | 0.01±0.02%                           | 0.01±0.02%                          |                         |
| <b>Fraction of choanocytes among pH3-positive cells</b>       | 88.33±11.18%                         | 94.64±9.83%                         |                         |

3 Each fraction is given as mean value and SD. Eight individuals have been examined; n is a  
 4 number of analyzed stacks.

5

1 **Table 2.** Fractions of proliferating cells in different body regions of *Leucosolenia variabilis*,  
 2 CLSM.

| Body region                                            | Cormus tube  | Proximal part of the diverticulum | Distal part of the diverticulum | Proximal part of the oscular tube | Middle part of the oscular tube | Distal part of the oscular tube | Oscular rim |
|--------------------------------------------------------|--------------|-----------------------------------|---------------------------------|-----------------------------------|---------------------------------|---------------------------------|-------------|
| n                                                      | 11           | 14                                | 14                              | 10                                | 10                              | 10                              | 10          |
| Fraction of EdU-positive cells among all cells         | 9.44±1.58%   | 9.84±2.60%                        | 6.53±2.08%                      | 9.76±1.91%                        | 11.01±1.76%                     | 10.58±1.66%                     | 0.40±0.96%  |
| Fraction of EdU-positive choanocytes among all cells   | 9.00±1.59%   | 9.14±2.33%                        | 6.07±2.16%                      | 9.43±1.95%                        | 10.62±1.55%                     | 10.19±1.57%                     |             |
| Fraction of EdU-positive mesohyl cells among all cells | 0.44±0.22%   | 0.71±0.68%                        | 0.46±0.55%                      | 0.33±0.25%                        | 0.40±0.73%                      | 0.39±0.38%                      |             |
| Fraction of choanocytes among EdU-positive cells       | 95.20±2.61%  | 93.00±4.73%                       | 92.08±9.89%                     | 96.48±2.91%                       | 96.68±5.11%                     | 96.36±2.96%                     |             |
| Fraction of pH3-positive cells among all cells         | 0.56±0.18%   | 0.64±0.24%                        | 0.50±0.20%                      | 0.71±0.36%                        | 0.69±0.18%                      | 0.74±0.17%                      | 0.17±0.20%  |
| Fraction of pH3-positive choanocytes among all cells   | 0.43±0.16%   | 0.41±0.17%                        | 0.21±0.15%                      | 0.56±0.30%                        | 0.54±0.16%                      | 0.52±0.16%                      |             |
| Fraction of pH3-positive mesohyl cells among all cells | 0.13±0.07%   | 0.22±0.13%                        | 0.29±0.15%                      | 0.15±0.07%                        | 0.15±0.10%                      | 0.22±0.09                       |             |
| Fraction of choanocytes among pH3-positive cells       | 78.31±12.93% | 65.30±15.43%                      | 40.64±22.29%                    | 79.09±7.06%                       | 78.70±11.22%                    | 70.25±10.94%                    |             |

1 Each fraction is given as mean value and SD. Six individuals have been examined; n is the  
 2 number of analyzed stacks.

3 **Table 3.** Fractions of cells in different phases of the cell cycle, flow cytometry.

| Species                        | N | SubG1         | G0/G1       | S           | G2/M       |
|--------------------------------|---|---------------|-------------|-------------|------------|
| <i>Halisarca dujardinii</i>    | 5 | 23.41±12.22 % | 38.94±5.9%  | 20.18±6.14% | 9.28±1.78% |
| <i>Leucosolenia variabilis</i> | 5 | 26.42±3.43%   | 53.88±2.59% | 12.58±0.76% | 4.63±1.79% |

4 Each proportion is given as mean value and SD.

5 **Table 4.** Fractions of apoptotic cells in the intact tissues of *H. dujardinii* and *L. variabilis*, CLSM.

| Species                        | Body region                   | n | CE-positive cells (% of all cells) |
|--------------------------------|-------------------------------|---|------------------------------------|
| <i>Halisarca dujardinii</i>    | Distant from the oscular tube | 7 | 0.03±0.05%                         |
| <i>Leucosolenia variabilis</i> | Oscular tube                  | 9 | 0.22±0.19%                         |
|                                | Cormus tube                   | 6 | 0.44±0.66%                         |
|                                | Diverticula                   | 3 | 0.21±0.16%                         |

6 Each proportion is given as mean value and SD. Three individuals per species have been examined; n  
 7 is the number of analyzed stacks.

8 **Table 5.** Fractions of cell populations revealed during the *in vivo* apoptosis investigation, flow cytometry.

| Species                     | N | TMRE- CE-  | TMRE+ CE-   | TMRE+ CE+  | TMRE- CE+ |
|-----------------------------|---|------------|-------------|------------|-----------|
| <i>Halisarca dujardinii</i> | 3 | 1.67±0.35% | 89.67±1.06% | 7.51±0.87% | 0         |

|                                |   |            |             |            |            |
|--------------------------------|---|------------|-------------|------------|------------|
| <i>Leucosolenia variabilis</i> | 2 | 13.7±3.25% | 70.55±1.48% | 8.58±0.77% | 0.06±0.01% |
|--------------------------------|---|------------|-------------|------------|------------|

- 1 The fraction of each population is represented by mean value and SD. N is the number of analyzed
- 2 individuals.
